# The efficacy of immune checkpoint inhibitors is limited in elderly NSCLC: a retrospective efficacy study and meta-analysis

Jiaxin Yin<sup>1,\*</sup>, Yuxiao Song<sup>1,\*</sup>, Yang Fu<sup>2</sup>, Wang Jun<sup>3</sup>, Jiazhao Tang<sup>1</sup>, Zhimin Zhang<sup>1</sup>, Qibin Song<sup>1</sup>, Bicheng Zhang<sup>1</sup>

<sup>1</sup>Cancer Center, Renmin Hospital of Wuhan University, Wuhan, China

<sup>2</sup>Department of Oncology, Xiangyang Hospital, Hubei University of Chinese Medicine, Xiangyang, China

<sup>3</sup>Department of Oncology, The First Affiliated Hospital of Shandong First Medical University, Jinan, China

\*Equal contribution and shared first authorship

**Correspondence to:** Bicheng Zhang; **email:** [bichengzhang@hotmail.com](mailto:bichengzhang@hotmail.com), <https://orcid.org/0000-0002-6759-6748>

**Keywords:** immune checkpoint inhibitors, non-small cell lung cancer, age, elderly, meta-analysis

**Received:** July 29, 2023

**Accepted:** November 3, 2023

**Published:** December 19, 2023

**Copyright:** © 2023 Yin et al. This is an open access article distributed under the terms of the [Creative Commons Attribution License](https://creativecommons.org/licenses/by/4.0/) (CC BY 4.0), which permits unrestricted use, distribution, and reproduction in any medium, provided the original author and source are credited.

## ABSTRACT

Immune checkpoint inhibitors (ICIs) have improved the long-term survival of NSCLC patients. However, the efficacy of ICIs in elderly NSCLC patients remains controversial. We conducted a retrospective study and meta-analysis exploring the efficacy of ICIs in those patients using public databases and RCTs. NSCLC patients were identified into elderly and non-elderly groups by age 75 years. The retrospective study showed significant differences in OS and PFS between non-elderly and elderly patients treated with ICIs ( $P=0.029$  and  $0.027$ ), with reduced efficacy in elderly NSCLC patients. ECOG PS also negatively affected OS in elderly NSCLC patients ( $P=0.007$ ). In meta-analysis, the HR for OS in the non-elderly and elderly groups were 0.74 and 0.90, respectively, and the difference between the two age groups was statistically significant ( $P=0.025$ ). ICIs resulted in a lower incidence of all-grade (OR= 0.47) and high-grade TRAEs (OR= 0.38) than chemotherapy. Our findings revealed that the survival benefit of ICIs in elderly patients ( $\geq 75$  years) may be lower than in non-elderly patients. In addition, the incidence of TRAEs induced by ICIs was lower than chemotherapy.

## INTRODUCTION

Lung cancer is a significant public health problem and the leading cause of mortality worldwide, with non-small-cell lung cancer (NSCLC) accounting for over 80% [1]. The incidence of NSCLC is more prevalent among the geriatric population, with a median age of 71 years at the newly diagnosed and up to 40% patients aged  $\geq 75$  years [2]. The Chinese expert consensus defines elderly cancer patients as  $\geq 75$  years old [3]. Therefore, a critical age of 75 is considered reasonable to differentiate the elderly and non-elderly in NSCLC patients. However, NSCLC patients aged 75 years or older are underrepresented; the percentage of those patients enrolled in clinical trials is extremely low.

Many phase II/III clinical trials exclude them, resulting in a lack of evidence for optimal treatment options for such population [4]. Thus, the therapeutic effect in elderly NSCLC patients aged  $\geq 75$  years deserves more attention.

The notable impact of emerging immune checkpoint inhibitors (ICIs) on the overall survival (OS) and treatment patterns of NSCLC patients is undeniable, which has transformed the conventional treatment regimen for NSCLC patients of all ages, including the elderly. After the approval of ICIs for NSCLC patients, the administration of ICIs increased from 4.7% in 2015 to 45.6% in 2019 [5]. The initial age of NSCLC patients using nivolumab or pembrolizumab was 69, with 27%

aged 75 years and older [6]. However, there is limited information from prospective trials for the efficacy of ICIs in NSCLC patients aged  $\geq 75$  years, and most of evidence comes from subgroup analyses. It has been observed in clinical practice that NSCLC patients of different ages respond differently to ICIs, and elderly patients tend to have poor outcomes. In addition, conclusions from existing studies are not entirely consistent regarding ICIs in elderly patients.

Elderly patients with NSCLC are confronting unique challenges due to age-related changes in their bodies, such as cellular senescence, epigenetic alterations, and loss of proteostasis (also known as immunosenescence) [7]. Aging of the innate and adaptive immune systems secondary to immunosenescence may reduce the efficacy of ICIs [8]. Additionally, chronic diseases and consequent organ dysfunction often co-exist in elderly patients, which may lead to poor treatment tolerance and an increase in treatment-related adverse events (TRAEs). Thus, the treatment goals for them should not only consider cancer control, but also the quality of life. However, few studies focus on the administration of ICIs to elderly NSCLC patients. Taking nearly half of NSCLC patients who are 75 years and older in the real world into account [9, 10], there is an urgent need for high-quality studies exploring the potential survival benefits of ICIs in those patients.

Given the above, this study aims to summarize the available data on the efficacy and safety of ICIs in aged  $\geq 75$  years old NSCLC patients from clinical trials. We used clinical information of NSCLC patients in the cBioPortal for Cancer Genomics database (<http://www.cbioportal.org/>) [11] to reflect the efficacy of ICIs in real-world elderly patients. However, the sample size was not convincing enough, so we performed a meta-analysis of randomized controlled trials (RCTs) to assess the long-term survival of ICIs in those patients.

## RESULTS

### Retrospective efficacy study

A total of 336 NSCLC patients treated with ICIs were identified in this study. The raw data from the cBio website are summarized in Supplementary Appendix 1. The demographic and clinical characteristics of these patients are summarized in Table 1. A total of 60 (17.9%) NSCLC patients aged 75 years or older were enrolled in this study. Most patients had a tumor histological type of lung adenocarcinoma, an Eastern Cooperative Oncology Group (ECOG) performance status (PS) of 1, and were mostly treated with anti-PD-1 monotherapy.

OS data were available for 133 of 336 NSCLC patients, 27 of whom were aged  $\geq 75$  years. The results of the univariate analysis of median OS (mOS) based on clinical characteristics are described in Table 1. The mOS for the whole NSCLC patients treated with ICIs was 4.6 months (range 3.2 months to 6.0 months). NSCLC patients aged  $< 75$  years had a longer OS of 5.2 months (range 3.7 months to 6.7 months), while those aged  $\geq 75$  years had a shorter OS of 3.6 months (range 1.9 months to 5.3 months). The univariate analysis showed that age significantly affects OS in NSCLC patients treated with ICIs ( $P = 0.0288$ ) (Figure 1). In addition, ECOG PS significantly affected OS with 8.9 months, 4.6 months, and 1.9 months for patients with PS = 0, 1, and 2, respectively ( $P = 0.0074$ ) (Supplementary Figure 1). No difference in OS was observed in subgroups defined by sex, tumor histology, and type of ICIs. Multivariate analysis revealed that ECOG PS was an independent risk factor for OS, with  $p$ -values of 0.032 and 0.005 for NSCLC patients with PS of 1 and 2, respectively, and hazard ratio (HR) of 1.95 (95% CI: 1.06 to 3.58) and 2.99 (95% CI: 1.40 to 6.4), respectively. Although age was insignificant ( $P = 0.068$ ), the HR was 1.51 (95% CI: 0.97 to 2.35), indicating that elderly NSCLC patients using ICIs have a 1.5-fold higher risk of death than non-elderly patients.

Progression-free survival (PFS) data were available for 296 of 336 NSCLC patients, 51 of whom were aged  $\geq 75$  years. The results of the univariate analysis of median PFS (mPFS) based on clinical characteristics are displayed in Supplementary Table 2. The mPFS of patients aged  $< 75$  years was 3.2 months, while mPFS of patients aged  $\geq 75$  years were only 2.3 months. Univariate analysis showed that age significantly affected PFS in NSCLC patients ( $P = 0.027$ ) (Supplementary Figure 2). While there was no statistical difference in the effect of sex and tumor histology on PFS. A statistically significant difference in ECOG and types of ICIs was validated ( $P < 0.001$  and 0.020, respectively) (Supplementary Table 2).

### Meta-analysis

#### *Search results and patient characteristics*

A total of 8749 publications were initially aligned with our fundamental search strategy. Following a meticulous screening process (Figure 2), 1 phase II/III and 10 phase III RCTs of NSCLC eligible for meta-analysis emerged, among which three were for pembrolizumab, two for nivolumab, two for the combination of nivolumab and ipilimumab, two for atezolizumab, one for ipilimumab and one for avelumab [12–19]. HR values corresponding to the 10 mg/kg dose of pembrolizumab were extracted from the KEYNOTE-010 study [20]. Eight trials

**Table 1. Characteristics and univariate analysis of mOS in NSCLC patients treated with ICIs from the cBio database.**

| Clinical characteristic    | Patient and percentage (%) | mOS (months) | P-value |
|----------------------------|----------------------------|--------------|---------|
| Total case                 | 133 (100%)                 | 4.6          | -       |
| Age                        |                            |              |         |
| Aged < 75 years old        | 106 (79.7%)                | 5.2          | 0.029*  |
| Aged ≥ 75 years old        | 27 (20.3%)                 | 3.6          |         |
| Sex                        |                            |              |         |
| Male                       | 60 (45.1%)                 | 4.0          | 0.955   |
| Female                     | 73 (54.9%)                 | 4.7          |         |
| Tumor Histology            |                            |              |         |
| Adenocarcinoma             | 114 (85.7%)                | 4.3          | 0.624   |
| Squamous                   | 19 (14.3%)                 | 5.9          |         |
| ECOG PS                    |                            |              |         |
| ECOG 0                     | 12 (9.0%)                  | 8.9          | 0.007** |
| ECOG 1                     | 104 (78.2%)                | 4.6          |         |
| ECOG 2                     | 17 (12.8%)                 | 1.9          |         |
| ECOG 3                     | 0 (0%)                     |              |         |
| Types of ICIs              |                            |              |         |
| Anti-PD-1                  | 101 (75.9%)                | 4.6          | 0.665   |
| Anti-PD-L1                 | 29 (21.8%)                 | 5.0          |         |
| Anti-PD-1/L1 + Anti-CTLA-4 | 3 (2.3%)                   | 2.4          |         |

\* $P < 0.05$ , \*\* $P < 0.01$ .

investigated anti-PD-1/L1, one investigated anti-CTLA-4, and two investigated anti-PD-1 plus anti-CTLA-4 therapy in experimental arms. A total of 7459 patients were incorporated into the meta-analysis, including 761 patients (10.2%) aged 75 years or older. The detailed baseline characteristics of each trial are shown in Table 2.

#### **Risk of bias**

The mean Jadad score was 3.4, with a range of 3 to 5. Detailed information pertaining to randomization,

blinding, and accounting is presented in Supplementary Table 3. All trials met high quality.

#### **Primary outcome: overall survival**

The primary outcome of this study concerns OS from RCTs comparing ICIs to non-ICIs treatments. Supplementary Figure 3A depicts the HR of each trial and the pooled result based on the random-effects model. Overall, the estimated HR is 0.75 (95% CI: 0.69 to 0.81,  $P < 0.001$ ), indicating that ICIs treatment

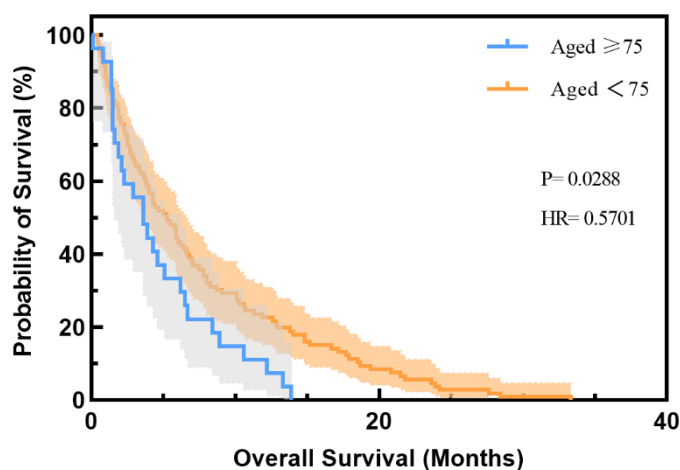

**Figure 1. Overall survival of NSCLC patients treated with ICIs based on age group in the cBio database.** HR, hazard ratio.

resulted in a 25% reduction in the risk of death when compared to non-ICIs treatment. However, individual trials observed significant heterogeneity ( $I^2 = 47.3\%$ , chi-squared  $P = 0.041$ ). Patients were then segregated into two age groups with a cutoff age of 75 years. For non-elderly patients, the estimated HR for OS between ICIs and chemotherapy is 0.74 (95% CI: 0.68 to 0.81) (Figure 3). Significant heterogeneity was observed among individual trials in this cohort ( $I^2 = 49.4\%$ , chi-squared  $P = 0.045$ ). Conversely, the random-effects

estimate of the HR for those aged 75 or older amounts to 0.90 (95% CI 0.76 to 1.07) (Figure 3), and there was no significant heterogeneity in this group ( $I^2 = 0.0\%$ , chi-squared  $P = 0.693$ ). We used independent samples T-tests to calculate OS for NSCLC patients in the non-elderly and elderly groups. Our results concluded that there was a significant difference in efficacy between non-elderly and elderly patients ( $P = 0.025$ ). In addition, the relevant factors affecting the efficacy of ICIs were summarized and presented in Supplementary Table 5.

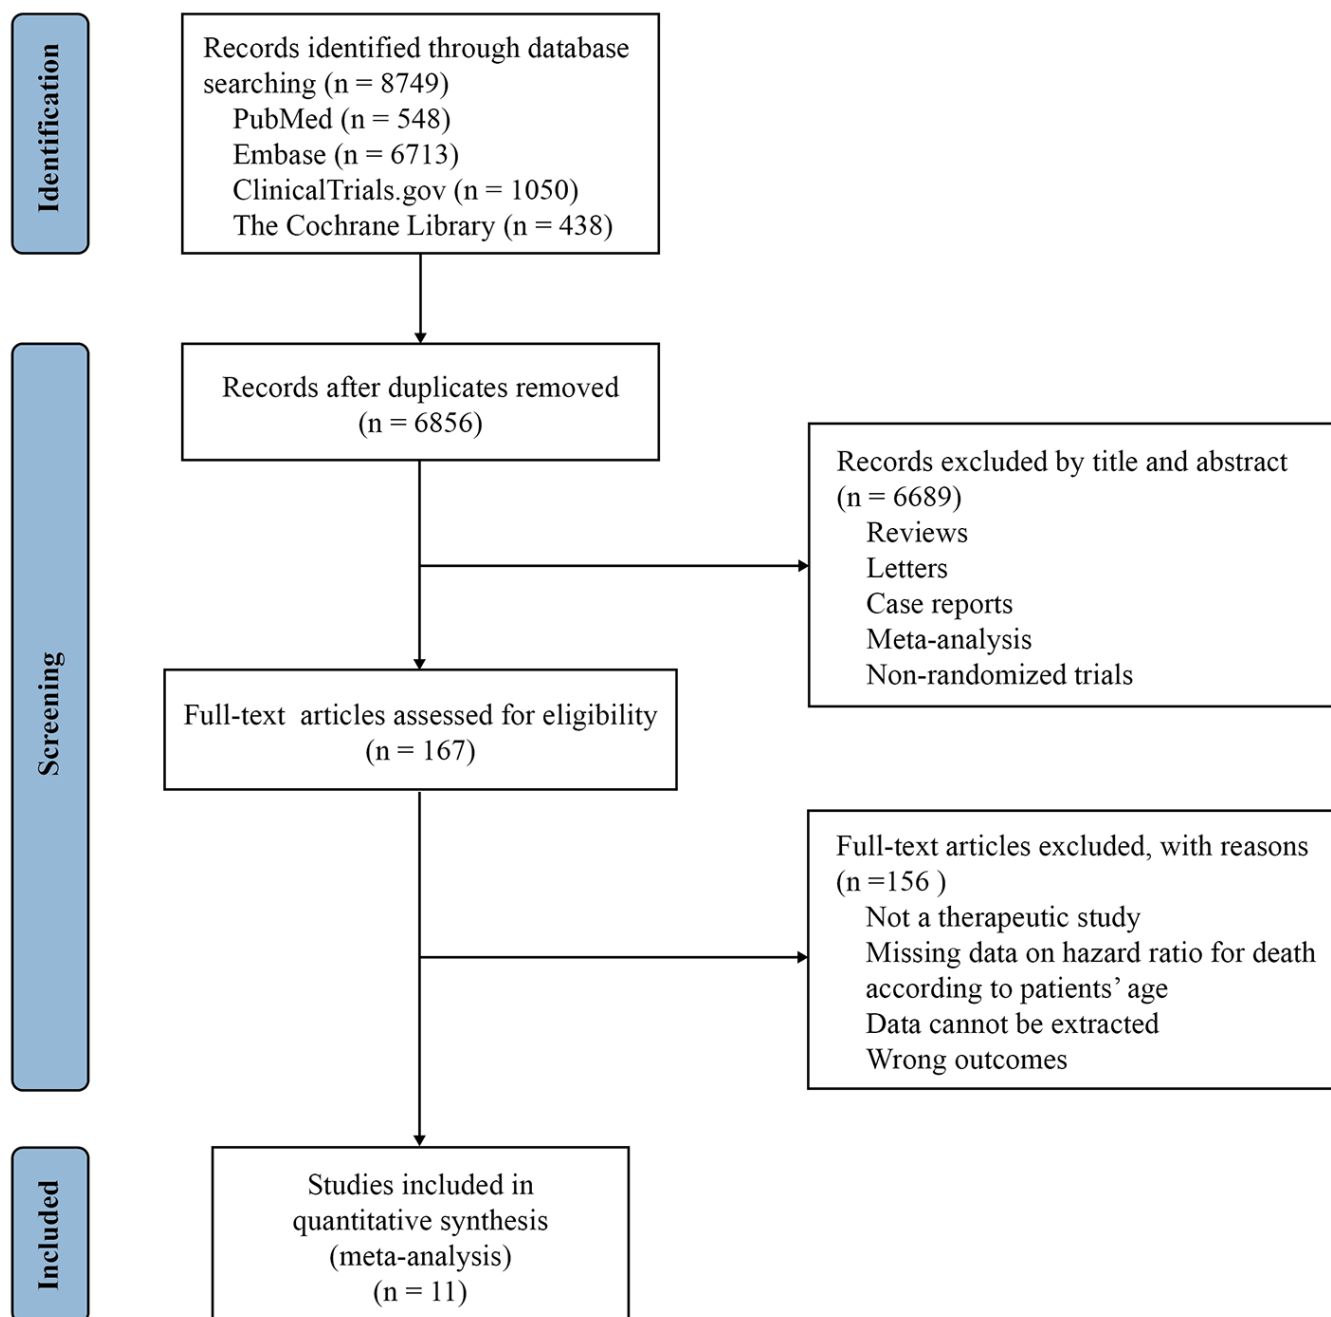

Figure 2. Study selection PRISMA flow diagram.

**Table 2. Baseline characteristics of 11 randomized controlled studies.**

| Studies         | Study number                   | Phase | Treatment lines | Experimental arm                             | Control arm  | Patients number | Median age (years) | N < 75 years | N ≥ 75 years | Median follow-up (months) |
|-----------------|--------------------------------|-------|-----------------|----------------------------------------------|--------------|-----------------|--------------------|--------------|--------------|---------------------------|
| Paz-Ares, 2021  | CheckMate 9LA (NCT03215706)    | III   | 1               | Nivolumab plus ipilimumab with chemotherapy  | Chemotherapy | 719             | 65 (59 to 70)      | 649          | 70           | 9.7                       |
| Borghaei, 2015  | CheckMate 057(NCT01673867)     | III   | 2               | Nivolumab                                    | Docetaxel    | 582             | 62 (21 to 85)      | 539          | 43           | 13.2                      |
| Hellmann, 2019  | CheckMate 227(NCT02477826)     | III   | 1               | Nivolumab plus ipilimumab                    | Chemotherapy | 793             | 64 (26 to 87)      | 712          | 81           | 29.3                      |
| Barlesi, 2018   | JAVELIN Lung 200 (NCT02395172) | III   | 2               | Avelumab with antihistamine and paracetamol  | Docetaxel    | 529             | 64 (58 to 89)      | 479          | 50           | 18.3                      |
| Socinski, 2021  | IMpower150 (NCT02366143)       | III   | 1               | Atezolizumab with carboplatin and paclitaxel | Chemotherapy | 697             | 63 (31 to 89)      | 627          | 65           | 32.4                      |
| Govindan, 2017  | Study 104(NCT01285609)         | III   | 2               | Ipilimumab with carboplatin and paclitaxel   | Chemotherapy | 749             | 64 (28 to 84)      | 678          | 71           | 12.5                      |
| Rittmeyer, 2017 | OAK(NCT02008227)               | III   | 2               | Atezolizumab                                 | Docetaxel    | 850             | 64 (33 to 85)      | 762          | 88           | 21                        |
| Brahmer, 2015   | CheckMate 017(NCT01642004)     | III   | 2               | Nivolumab                                    | Docetaxel    | 272             | 63 (39 to 85)      | 243          | 29           | 11                        |
| Herbst, 2015    | KEYNOTE 010(NCT01905657)       | III   | 2               | Pembrolizumab                                | Docetaxel    | 689             | 63 (56 to 89)      | 943          | 90           | 13.1                      |
| Reck, 2016      | KEYNOTE 024(NCT02142738)       | III   | 1               | Pembrolizumab                                | Chemotherapy | 305             | 65 (33 to 90)      | 260          | 45           | 11.2                      |
| De-Castro, 2022 | KEYNOTE 042(NCT02220894)       | III   | 1               | Pembrolizumab                                | Chemotherapy | 1274            | 63 (25 to 89)      | 1145         | 129          | 61.1                      |

Funnel plots for the risk ratio of the 75-year-old age threshold and efficacy were shown in Supplementary Figure 4. The funnel plot analysis was symmetrical, and the p-value of the bias test is  $> 0.05$ , thereby identifying no evidence of publication bias in this study. When one trial was removed from the analyses for OS, the corresponding pooled HRs were not significantly altered, indicating that the presented results were relatively stable (Supplementary Figure 5). Subsequently, random-effects meta-regression analysis was performed, and a p-value of 0.089 was observed in terms of OS between the age groups.

#### **Secondary outcome: progression-free survival**

Among studies included in this analysis, 11 had HR for PFS, including five based on age groups. The combined results based on the random-effects model estimated HR for PFS is 0.79 (95% CI: 0.70 to 0.89;  $P < 0.001$ ) (Supplementary Figure 3B). The chi-squared test for heterogeneity was highly significant ( $I^2 = 78.1\%$ ,  $P < 0.001$ ). The random-effects estimate of the HR of ICIs compared with chemotherapy in the non-elderly group is 0.82 (95% CI: 0.68 to 1.00;  $P = 0.045$ ; Supplementary Figure 6). However, the HR estimate for elderly patients is 0.96 (95% CI: 0.70 to 1.32;  $P = 0.802$ ; Supplementary Figure 6). For the non-elderly group, there is substantial

heterogeneity ( $I^2 = 71.3\%$ , chi-squared  $P = 0.008$ ); but for the elderly group, there was no heterogeneity ( $I^2 = 5.4\%$ , chi-squared  $P = 0.376$ ).

#### **Safety analysis**

A total of 11 RCTs were included for safety analysis, including the number of patients with all-grade and high-grade TRAEs in the intervention group (ICIs group) and the control group (chemotherapy group). In terms of ICIs in NSCLC patients, there was a significantly lower incidence of all-grade TRAEs than non-ICIs (OR = 0.47; 95% CI: 0.30 to 0.73;  $p < 0.0001$ ) (Figure 4A). Compared with non-ICIs, ICIs result in a lower incidence of high-grade TRAEs (OR = 0.38; 95% CI: 0.21 to 0.71;  $p < 0.0001$ ) (Figure 4B). We next performed subgroup analysis, given the significant heterogeneity observed ( $I^2 = 92.7\%$  and  $97.4\%$ , respectively).

#### **Subgroup analysis**

Efficacy subgroup analysis was conducted in the elderly group based on ECOG PS, types of ICIs, and treatment lines. Firstly, we estimated the effect of ECOG PS on OS. The HR for OS in the PS = 0 subgroup was 0.73 (95% CI: 0.62 to 0.85), and in the PS = 1 subgroup was 0.81 (95% CI: 0.74 to 0.89). There was no heterogeneity in the two subgroups (chi-squared  $P = 0.135$  and

P= 0.317, respectively) (Supplementary Figure 7). Subsequently, we evaluated the effects of different types of ICIs. OS data were available from 8 trials for the anti-PD-1/L1 treatment, 1 for the anti-CTLA-4 treatment, and 2 for the combination treatment. The HR for OS in the anti-PD-1/L1 subgroup was 0.74 (95% CI: 0.67 to 0.82) in the non-elderly group and 0.87 (95% CI: 0.71 to 1.07) in the elderly group. In the anti-CTLA-4 subgroup, the HR for OS was 0.93 (95% CI: 0.72 to 1.02) in the non-elderly group and 0.85 (95% CI: 0.51 to 1.42) in the elderly group. In the combination subgroup, the HR for OS was 0.68 (95% CI: 0.53 to 0.88) in the non-elderly group and 1.03 (95% CI: 0.72 to 1.48) in the elderly group (Supplementary Table 4).

In the end, elderly and non-elderly NSCLC patients were categorized into first-line and second-line subgroups, respectively, to explore the OS benefit from different treatment lines in NSCLC patients of different ages. For non-elderly NSCLC patients, the HR for OS was 0.74 (95% CI: 0.66 to 0.82) in the first-line subgroup and 0.75 (95% CI: 0.63 to 0.88) in the second-line subgroup (Supplementary Figure 8A), which did not show significant difference. For elderly NSCLC patients (aged  $\geq 75$  years), HRs were 0.88 (95% CI: 0.71 to 1.08) and 0.95 (95% CI: 0.71 to 1.27) for the first- and second-line subgroups, respectively (Supplementary Figure 8B), which were also not significantly different.

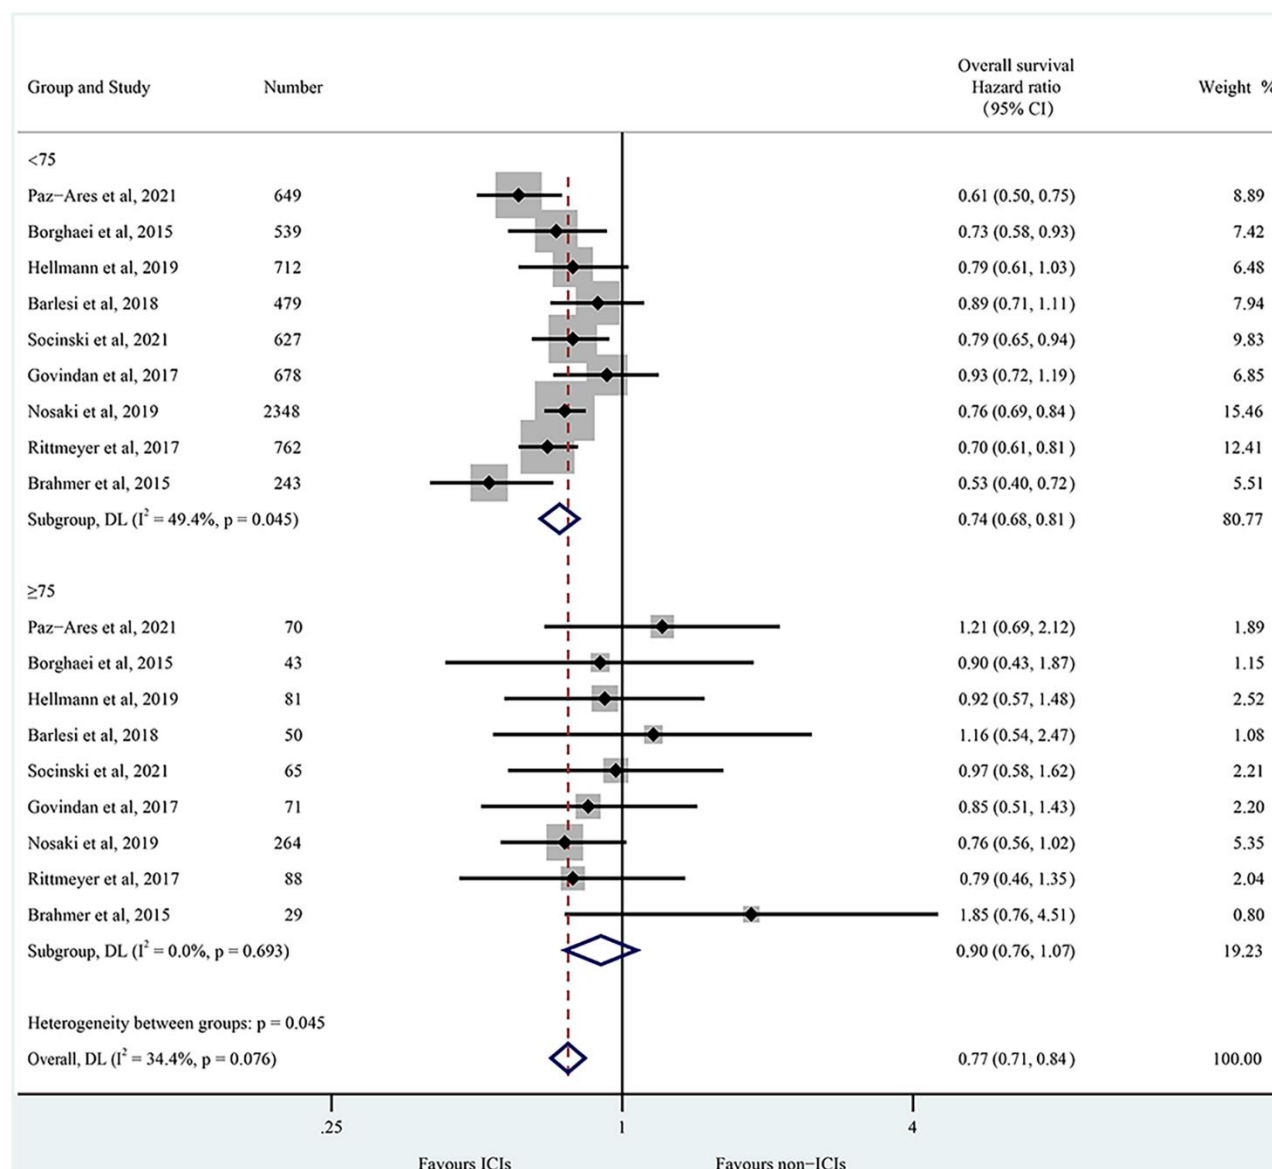

**Figure 3. Forest plots of overall survival of NSCLC patients < 75 years and  $\geq 75$  years by age.** CI, confidence interval; ICIs, immune checkpoint inhibitors.

Safety subgroup analysis regarding all-grade TRAEs showed that compared to chemotherapy, anti-PD-1/L1 antibodies such as nivolumab, pembrolizumab, avelumab, and atezolizumab resulted in a lower incidence of TRAEs with ORs of 0.27 (95% CI: 0.19 to 0.39), 0.29 (95% CI: 0.16 to 0.53), 0.29 (95% CI: 0.21 to 0.42), and 0.42 (95% CI: 0.19 to 0.96), respectively. However, TRAEs were higher in the dual immunotherapy as well as ipilimumab, with ORs of

1.05 (95% CI: 0.49 to 2.28) and 1.85 (95% CI: 1.23 to 2.78), respectively (Supplementary Figure 9A). Data on high-grade TRAEs varied slightly, with nivolumab and avelumab exhibiting extremely low incidences of TRAEs, with ORs of 0.09 and 0.11, respectively. Anti-CTLA-4 antibodies (ipilimumab), however, had more than twice the incidence of TRAEs than chemotherapy (OR= 2.01) (Supplementary Figure 9B and Table 3).

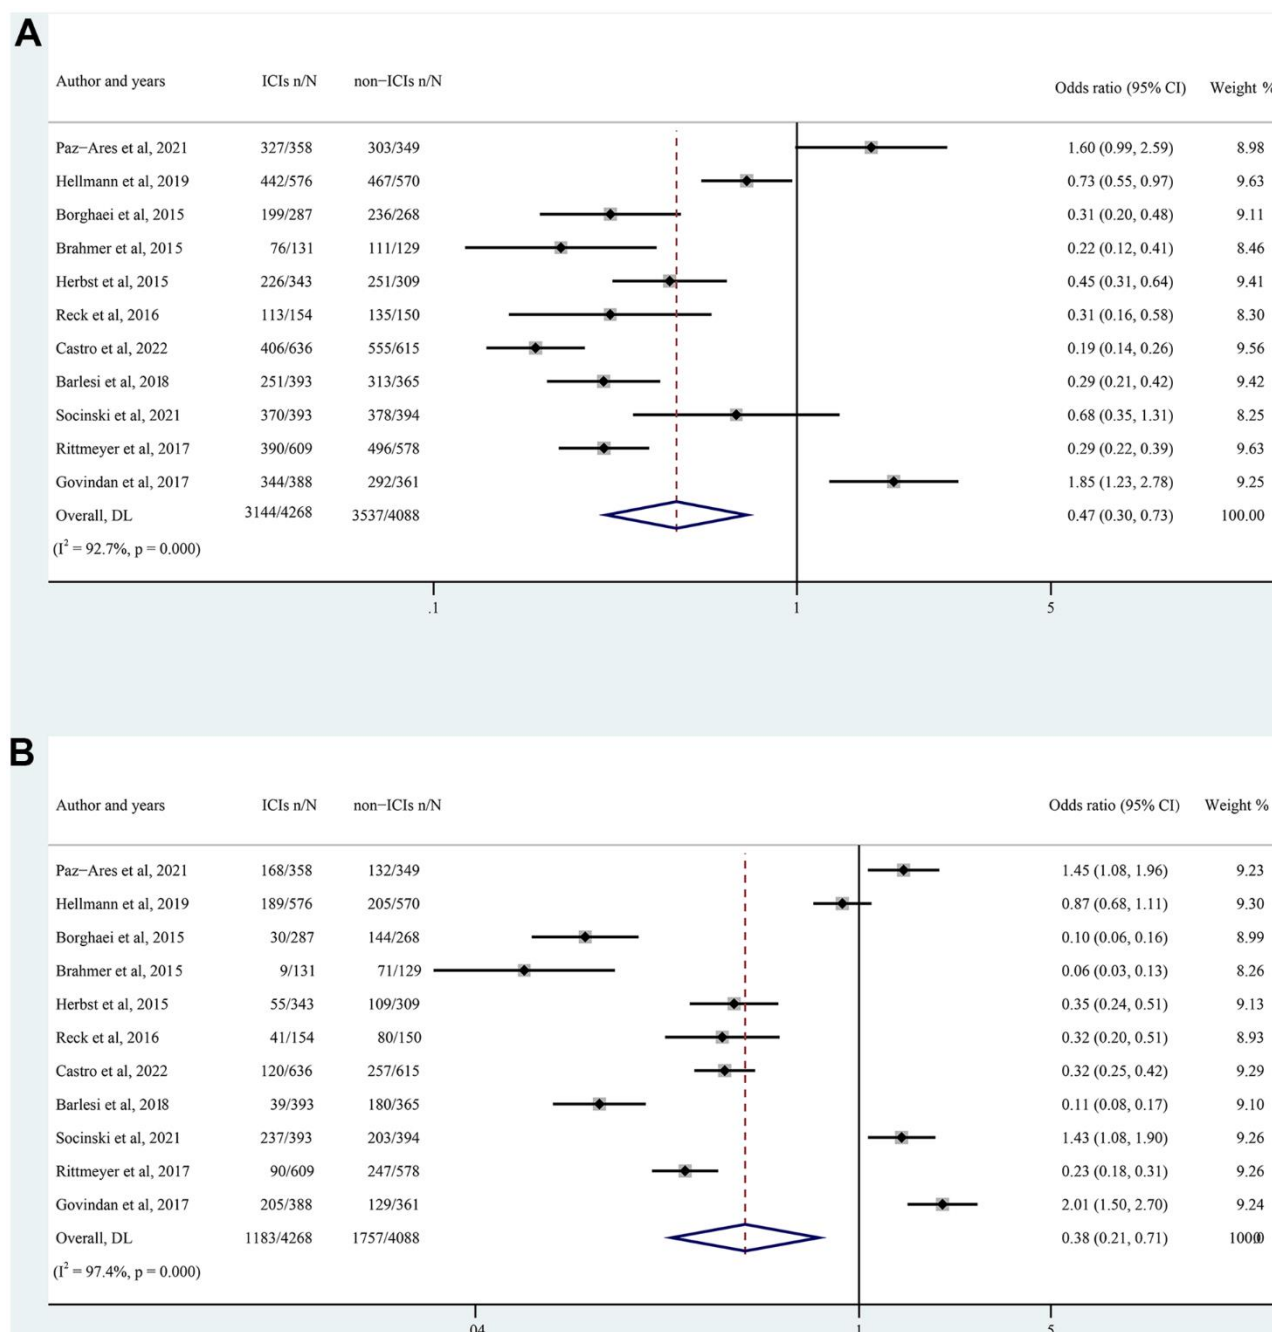

**Figure 4.** Forest plot of all-grade (A) and high-grade (B) TRAEs in NSCLC patients treated with ICIs versus non-ICIs. CI, confidence interval; TRAEs, treatment-related adverse events; ICIs, immune checkpoint inhibitors.

**Table 3. Subgroup analysis for different types of ICIs in terms of the incidence of all-grade and high-grade TRAEs in the ICIs group and chemotherapy group.**

| Type of immunotherapy     | Number of studies | OR (95% CI)         |                     |
|---------------------------|-------------------|---------------------|---------------------|
|                           |                   | All-grade TRAEs     | High-grade TRAEs    |
| Nivolumab                 | 2                 | 0.27 (0.19 to 0.39) | 0.09 (0.05 to 0.14) |
| Pembrolizumab             | 3                 | 0.29 (0.16 to 0.53) | 0.33 (0.27 to 0.40) |
| Avelumab                  | 1                 | 0.29 (0.21 to 0.42) | 0.11 (0.08 to 0.17) |
| Atezolizumab              | 2                 | 0.42 (0.19 to 0.96) | 0.58 (0.10 to 3.42) |
| Ipilimumab                | 1                 | 1.85 (1.23 to 2.78) | 2.01 (1.50 to 2.70) |
| Nivolumab plus Ipilimumab | 2                 | 1.05 (0.49 to 2.28) | 1.12 (0.67 to 1.85) |

## DISCUSSION

Considering that few high-level studies have pooled the efficacy of ICIs in NSCLC patients aged  $\geq 75$  years and those patients account for more than 1/3 of clinical practice. In this study, NSCLC patients were divided into two groups based on age: those aged  $< 75$  years old and those aged  $\geq 75$  years old. Overall, both the retrospective study and meta-analysis showed statistically differences in OS between the two groups ( $P=0.029$  and  $0.025$ , respectively), indicating that age may have a considerable effect on the efficacy of ICIs. In non-elderly NSCLC patients, ICIs provide a significant survival benefit (HR for OS: 0.74 and PFS: 0.82), but have reduced efficacy in elderly patients (HR for OS: 0.90, for PFS: 0.96). In addition, our retrospective study revealed that ECOG PS was negatively correlated with OS and PFS, patients with higher PS having lower OS and PFS, consistent with previous study [21]. On the other hand, this meta-analysis also showed PS of 0 or 1 barely had impact on OS in elderly NSCLC patients. We speculate that this may be due to RCTs' strict patient inclusion criteria, in which NSCLC patients with poor general conditions are usually excluded, thus, the meta-analysis did not show that ECOG was associated with poorer OS. Regarding safety analysis, ICIs resulted in a 53% lower incidence of all-grade TRAEs and 62% high-grade TRAEs than chemotherapy. In addition, subgroup analysis revealed that elderly patients tend to have better outcomes when classified according to the types of ICIs, especially those treated with PD-1/L1 inhibitors.

ICIs have demonstrated superior efficacy in NSCLC patients [22], but many studies have conflicting conclusions for elderly NSCLC patients. Several studies have shown that ICIs remain highly effective in elderly patients. Nishijima et al. [23] proposed that ICIs had significant OS for younger and older patients aged 65-70. In addition, a meta-analysis found that first-line ICIs treatment for patients aged  $\geq 75$  years with advanced

tumors appears to be effective [24]. However, more studies indicated that ICIs were less effective in elderly patients. Age-stratified results from KEYNOTE-010 and KEYNOTE-042 studies showed significantly lower survival benefits in patients with advanced NSCLC aged  $\geq 75$  years than those aged  $< 75$  years [25]. A multicenter retrospective cohort study explored OS trends in advanced NSCLC patients treated with ICIs at different ages [5]. The results showed that the population with the most significant survival benefit in the ICIs era was patients under 75 years old, and age was negatively correlated with OS. Even Takigawa et al. [9] pointed out that ICIs were not shown to be more effective than chemotherapy alone in NSCLC patients aged  $\geq 75$  years. Our findings partially support the notion that ICIs show reduced efficacy in elderly NSCLC patients.

The phenomenon of ICIs leading to reduced efficacy in elderly NSCLC patients actually makes sense. Elderly patients have a completely different immune micro-environment, including increased tumor mutation burden (TMB), increased expression of immune checkpoint genes, and low T-cell receptor diversity. Regarding drug mechanism of action, ICIs exert anti-tumor effects mainly by blocking specific immune checkpoints on T cells and primarily rely on the patient's immune system [26]. The immune system of elderly patients exhibits decreased immunosurveillance and antigen presentation. The reduced efficacy of ICIs in elderly patients may be partially related to immunosenescence. Immunosenescence may not only be associated with an increased risk of cancer progression, but may also make patients less responsive to ICIs by upregulating immunosuppressive signaling [8, 27]. Immunosenescence is characterized by a decrease in the peripheral pool of naive T cells and T cell receptors and changes in the composition of the regulatory T cell population [28]. Key factors that stimulate T-cell activation, such as interferon- $\alpha$  (IFN- $\alpha$ ) and interleukin-12 (IL-12), are secreted less in elderly patients, resulting in reduced dendritic cells (DCs)

maturation [29]. CD8<sup>+</sup> T cells are the main immune cells targeted by ICIs. As patients aging, both the initial T-lymphocyte population and the diversity of T-cell receptor (TCR) decrease, all of which interfere with the normal functioning of CD8<sup>+</sup> T cells [30]. In addition, regulatory T cells (Tregs) with immunosuppressive effects increase with age, causing a further decline in anti-tumor immunity in elderly NSCLC patients [31]. Thus, elderly NSCLC patients may respond differently to ICIs than younger patients. Moreover, elderly patients have poorer ECOG PS (usually  $\geq 2$ ) due to comorbidities of multiple chronic diseases. NSCLC patients with impaired PS treated with ICIs were twice less likely to achieve a response compared to the general population [21]. Combined with impaired T cells and ECOG PS, the theoretical basis supports the reduced efficacy of ICIs in elderly NSCLC patients.

However, our study also had some limitations. First, the limited number of aged  $\geq 75$  years NSCLC patients included in the retrospective study and meta-analysis may have affected the generalizability of our findings. Additionally, the follow-up duration included in our study was relatively short, so we could not determine the long-term efficacy of ICIs in elderly NSCLC patients. Furthermore, the safety meta-analysis explored the incidence of TRAEs in the overall population with ICIs and chemotherapy, but not in elderly patients  $\geq 75$  years, due to insufficient data in the original literature. In fact, elderly patients are usually associated with poorer general conditions in the real world. Thus, ICIs treatment in this population requires comprehensive consideration.

In conclusion, our study demonstrates that ICIs are an effective treatment for non-elderly NSCLC patients. However, ICIs may have reduced efficacy in elderly NSCLC patients, especially those aged 75 years or older. Moreover, ICIs resulted in a substantially lower incidence of TRAEs than chemotherapy, indicating that ICIs are a safer treatment for NSCLC patients. For elderly NSCLC patients, sometimes it is not the tumor that leads to death but the toxic side-effects caused by the treatment. Therefore, we should consider the efficacy and evaluate it in the context of TRAEs. NSCLC patients with poorer general conditions (higher ECOG PS) should be excluded from ICIs treatment. When choosing ICIs for elderly patients, the type of ICIs should be considered, with priority given to PD-1/L1 inhibitors such as pembrolizumab and nivolumab. Real-world and prospective studies evaluating the efficacy of ICIs in elderly NSCLC patients are needed to formulate the best treatment strategy and break through the status quo in the treatment of elderly NSCLC.

## MATERIALS AND METHODS

### Retrospective efficacy study

#### *Data source*

The cBioPortal for Cancer Genomics database (<http://www.cbioportal.org/>) contains raw data on more than 20,000 tumor samples from multiple cancer studies. The cBio website includes not only molecular profiles of cancer genomics projects, but also information on patients' clinical data. Among them are 29 datasets on NSCLC studies containing a total of 13,690 NSCLC patients.

#### *Search strategy and data extraction*

We performed a retrospective analysis using the public dataset available on the cBio website. The inclusion criteria were as follows: (i) NSCLC patients, (ii) treatment with ICIs, and (iii) survival data such as OS or PFS were available. Patients with NSCLC who had surgical resection were excluded from this study. Data pertaining to case ID, demographics (age, sex, ECOG PS), tumor histology type, types of ICIs, and survival data (OS, PFS) were analyzed.

#### *Data analysis*

Descriptive statistics were used to describe demographic and clinical characteristics. Univariate analysis was performed using the Kaplan-Meier method to compare OS and PFS between patients' clinical characteristics (such as age, sex, ECOG PS, types of ICIs, and histology type).  $P < 0.05$  was considered statistically significant. Parameters with  $P < 0.05$  based on the univariate analysis were further included in the multivariate Cox regression analysis. All statistical analyses were performed using SPSS 26.0 software (IBM, Armonk, NY, USA).

### Meta-analysis

This meta-analysis (PROSPERO registration No. CRD42023394032) compared OS and PFS in elderly and non-elderly patients to investigate whether ICIs are still effective for elderly patients. The incidence of TRAEs due to ICIs and chemotherapy was calculated to indirectly reflect which treatment has lower toxicity in elderly NSCLC patients (who are usually in poor general condition).

#### *Search strategy and selection criteria*

This meta-analysis followed the Preferred Reporting Items for Systematic Reviews and Meta-Analysis (PRISMA) [32]. A checklist of PRISMA items is presented in Supplementary Table 1. We conducted a comprehensive literature search of PubMed, Embase, ClinicalTrials.gov, and Cochrane Library databases

to identify the relevant articles. The search spanned the dates of each database's inception through 2 July 2023. Search terms included the following keywords: “PD-1”, “programmed cell death protein 1”, “PD-L1”, “programmed cell death ligand 1”, “pembrolizumab”, “cemiplimab”, “nivolumab”, “avelumab”, “atezolizumab”, “durvalumab”, “CTLA-4”, “cytotoxic T-lymphocyte-associated protein 4”, “ipilimumab”, “tremelimumab”, “NSCLC”, “non-small cell lung cancer”, and “immune checkpoint inhibitors”, limiting to RCTs. The American Society of Clinical Oncology (ASCO) and European Society for Medical Oncology (ESMO) meeting database was also searched for additional studies. The detailed search strategies were shown in Supplementary Doc 1 (Supplementary Material).

The inclusion criteria were as follows: (i) RCTs in patients with NSCLC, (ii) Studies comparing the efficacy of ICIs to non-ICIs, (iii) Subgroup analysis of OS using a HR based on the age ( $\geq 75$  years versus  $< 75$  years). Two reviewers (YJX and SYX) independently screened the titles and abstracts to identify the potential articles, and then assessed the eligibility of the full texts of these relevant articles.

#### **Data extraction**

Data extracted from eligible studies included characteristics of both the study (first author, publication year, study name and National Clinical Trial (NCT) number, trial phase, treatment arms) and the study population (total number of randomized patients, median age, number of patients aged  $< 75$  years and  $\geq 75$  years, median follow-up duration). We collected data on HR with a 95% confidence interval (CI) for OS and PFS based on age subgroups ( $< 75$  years vs.  $\geq 75$  years). Studies without HR by age group or excluded elderly patients were not included. Then, we extracted the number of reported events between all-grade and high-grade TRAEs from the experimental and control groups in each study to perform a safety analysis. In this study, grade  $\geq 3$  was considered as high-grade TRAEs. Disagreement in the literature search and data extraction was resolved by discussion between all authors of this meta-analysis.

#### **Quality of evidence**

Search strategies were finally integrated with the Cochrane highly sensitive search strategy to identify RCTs. The methodological quality of the studies was assessed using the five-point Jadad scale, which mainly evaluated three aspects (randomization, blinding, withdrawals and dropouts) of all the studies [33]. A score of 0-2 was considered low quality, while a score of 3-5 was regarded as high quality.

#### **Data synthesis and analysis**

Our analysis included two groups: non-elderly patients (aged  $< 75$  years) and elderly patients (aged  $\geq 75$  years). A meta-analysis was conducted to quantify the effect of ICIs on OS and PFS using the HR with the corresponding 95% CI. All-grade and high-grade TRAEs were synthesized via meta-analysis using the Mantel–Haenszel model. We calculated the odds ratio (OR) and 95% CI between the experimental and control groups based on the number of reported events and sample size.

To account for the potential heterogeneity among the included trials, all the pooled HR of this meta-analysis was calculated using random-effects models. We combined the HR estimates for patients aged  $< 65$  years and 65-75 years, and the combined estimate was used for the subsequent meta-analysis. The forest plots were utilized to summarize and visualize the HR and OR with 95% CI for each study. The DerSimonian-Laird method was employed to examine the trials' heterogeneity and quantified by the  $I^2$  index and Chi-squared p-values. The studies were deemed substantially heterogeneous when  $P < 0.1$  and  $I^2 > 50\%$ . Differences in the HRs between the non-elderly and elderly groups were assessed using an independent sample t-test, with a two-sided p-value of  $< 0.05$  defined as significant.

To analyze the age effect in ICIs, subgroup analyses were conducted using the ECOG PS and types of ICIs (PD-1, PD-L1, CTLA-4, and a combination of two). A safety subgroup analysis was performed to assess which types of ICIs resulted in a lower incidence of TRAEs. Funnel plots were utilized to evaluate the presence of publication bias. A sensitivity analysis was performed to verify the stability of the summary results. Meta-regression was also conducted to investigate the effect of age differences on ICIs efficacy after adjusting for other factors. All the statistical analyses were performed using Stata version 17.0 (Stata Corp, College Station, TX, USA).

#### **Availability of data and materials**

The datasets generated during and/or analyzed during the current study are available from the corresponding author on reasonable request.

#### **AUTHOR CONTRIBUTIONS**

All authors contributed to the study concept and design. JY and YS participated in analysis of the data. JY and YS contributed to drafting of the manuscript. JY, YS, and JT extracted the data and performed the quality assessment. YF, JW, and ZZ revised the manuscript. QS

and BZ reviewed the data. BZ came up with the original idea and supervised the work. All authors contributed to the article and approved the final version.

## CONFLICTS OF INTEREST

The authors declare that they have no conflicts of interest.

## FUNDING

This work was supported by the National Natural Science Foundation of China under Grant (No. 82272928); CSCO-BMS Cancer Immunotherapy Research Foundation under Grant (No. Y-BMS2019-003); Knowledge Innovation Program of Wuhan-Basic Research under Grant (No. 2022020801010475); and Science and Technology Research and Development Project Fund of Xiangyang under Grant (No. 2022YL39A).

## REFERENCES

1. Siegel RL, Miller KD, Wagle NS, Jemal A. Cancer statistics, 2023. *CA Cancer J Clin.* 2023; 73:17–48.  
<https://doi.org/10.3322/caac.21763>  
PMID:36633525
2. Gomes F, Wong M, Battisti NML, Kordbacheh T, Kiderlen M, Greystoke A, Luciani A. Immunotherapy in older patients with non-small cell lung cancer: Young International Society of Geriatric Oncology position paper. *Br J Cancer.* 2020; 123:874–84.  
<https://doi.org/10.1038/s41416-020-0986-4>  
PMID:32694695
3. Wang J, Zhang B, Peng L, Liu X, Sun J, Su C, Wang H, Zhao Z, Si L, Duan J, Zhang H, Li M, Zhu B, et al. Chinese expert consensus recommendations for the administration of immune checkpoint inhibitors to special cancer patient populations. *Ther Adv Med Oncol.* 2023; 15:17588359231187205.  
<https://doi.org/10.1177/17588359231187205>  
PMID:37484525
4. Russo AE, Priolo D, Antonelli G, Libra M, McCubrey JA, Ferraù F. Bevacizumab in the treatment of NSCLC: patient selection and perspectives. *Lung Cancer (Auckl).* 2017; 8:259–69.  
<https://doi.org/10.2147/LCTT.S110306>  
PMID:29276417
5. Voruganti T, Soulos PR, Mamtani R, Presley CJ, Gross CP. Association Between Age and Survival Trends in Advanced Non-Small Cell Lung Cancer After Adoption of Immunotherapy. *JAMA Oncol.* 2023; 9:334–41.  
<https://doi.org/10.1001/jamaoncol.2022.6901>  
PMID:36701150
6. Khozin S, Abernethy AP, Nussbaum NC, Zhi J, Curtis MD, Tucker M, Lee SE, Light DE, Gossai A, Sorg RA, Torres AZ, Patel P, Blumenthal GM, Pazdur R. Characteristics of Real-World Metastatic Non-Small Cell Lung Cancer Patients Treated with Nivolumab and Pembrolizumab During the Year Following Approval. *Oncologist.* 2018; 23:328–36.  
<https://doi.org/10.1634/theoncologist.2017-0353>  
PMID:29317551
7. Schneider JL, Rowe JH, Garcia-de-Alba C, Kim CF, Sharpe AH, Haigis MC. The aging lung: Physiology, disease, and immunity. *Cell.* 2021; 184:1990–2019.  
<https://doi.org/10.1016/j.cell.2021.03.005>  
PMID:33811810
8. Ferrara R, Mezquita L, Auclin E, Chaput N, Besse B. Immunosenescence and immunecheckpoint inhibitors in non-small cell lung cancer patients: Does age really matter? *Cancer Treat Rev.* 2017; 60:60–8.  
<https://doi.org/10.1016/j.ctrv.2017.08.003>  
PMID:28889085
9. Takigawa N, Ochi N, Nakagawa N, Nagasaki Y, Taoka M, Ichiyama N, Mimura A, Nakanishi H, Kohara H, Yamane H. Do Elderly Lung Cancer Patients Aged ≥75 Years Benefit from Immune Checkpoint Inhibitors? *Cancers (Basel).* 2020; 12:1995.  
<https://doi.org/10.3390/cancers12071995>  
PMID:32708291
10. O'Connor JM, Fessele KL, Steiner J, Seidl-Rathkopf K, Carson KR, Nussbaum NC, Yin ES, Adelson KB, Presley CJ, Chiang AC, Ross JS, Abernethy AP, Gross CP. Speed of Adoption of Immune Checkpoint Inhibitors of Programmed Cell Death 1 Protein and Comparison of Patient Ages in Clinical Practice vs Pivotal Clinical Trials. *JAMA Oncol.* 2018; 4:e180798.  
<https://doi.org/10.1001/jamaoncol.2018.0798>  
PMID:29800974
11. Cerami E, Gao J, Dogrusoz U, Gross BE, Sumer SO, Aksoy BA, Jacobsen A, Byrne CJ, Heuer ML, Larsson E, Antipin Y, Reva B, Goldberg AP, et al. The cBio cancer genomics portal: an open platform for exploring multidimensional cancer genomics data. *Cancer Discov.* 2012; 2:401–4.  
<https://doi.org/10.1158/2159-8290.CD-12-0095>  
PMID:22588877
12. Paz-Ares L, Ciuleanu TE, Cobo M, Schenker M, Zurawski B, Menezes J, Richardet E, Bennouna J, Felipe E, Juan-Vidal O, Alexandru A, Sakai H, Lingua A, et al. First-line nivolumab plus ipilimumab combined with two cycles of chemotherapy in patients with non-small-cell lung cancer (CheckMate 9LA): an international, randomised, open-label, phase 3 trial. *Lancet Oncol.* 2021; 22:198–211.  
[https://doi.org/10.1016/S1470-2045\(20\)30641-0](https://doi.org/10.1016/S1470-2045(20)30641-0)  
PMID:33476593

13. Borghaei H, Paz-Ares L, Horn L, Spigel DR, Steins M, Ready NE, Chow LQ, Vokes EE, Felip E, Holgado E, Barlesi F, Kohlhäufel M, Arrieta O, et al. Nivolumab versus Docetaxel in Advanced Nonsquamous Non-Small-Cell Lung Cancer. *N Engl J Med*. 2015; 373:1627–39.  
<https://doi.org/10.1056/NEJMoa1507643>  
PMID:26412456
14. Hellmann MD, Paz-Ares L, Bernabe Caro R, Zurawski B, Kim SW, Carcereny Costa E, Park K, Alexandru A, Lupinacci L, de la Mora Jimenez E, Sakai H, Albert I, Vergnenegre A, et al. Nivolumab plus Ipilimumab in Advanced Non-Small-Cell Lung Cancer. *N Engl J Med*. 2019; 381:2020–31.  
<https://doi.org/10.1056/NEJMoa1910231>  
PMID:31562796
15. Barlesi F, Vansteenkiste J, Spigel D, Ishii H, Garassino M, de Marinis F, Özgüroğlu M, Szczesna A, Polychronis A, Uslu R, Krzakowski M, Lee JS, Calabrò L, et al. Avelumab versus docetaxel in patients with platinum-treated advanced non-small-cell lung cancer (JAVELIN Lung 200): an open-label, randomised, phase 3 study. *Lancet Oncol*. 2018; 19:1468–79.  
[https://doi.org/10.1016/S1470-2045\(18\)30673-9](https://doi.org/10.1016/S1470-2045(18)30673-9)  
PMID:30262187
16. Socinski MA, Nishio M, Jotte RM, Cappuzzo F, Orlandi F, Stroyakovskiy D, Nogami N, Rodríguez-Abreu D, Moro-Sibilot D, Thomas CA, Barlesi F, Finley G, Kong S, et al. IMpower150 Final Overall Survival Analyses for Atezolizumab Plus Bevacizumab and Chemotherapy in First-Line Metastatic Nonsquamous NSCLC. *J Thorac Oncol*. 2021; 16:1909–24.  
<https://doi.org/10.1016/j.jtho.2021.07.009>  
PMID:34311108
17. Govindan R, Szczesna A, Ahn MJ, Schneider CP, Gonzalez Mella PF, Barlesi F, Han B, Ganea DE, Von Pawel J, Vladimirov V, Fadeeva N, Lee KH, Kurata T, et al. Phase III Trial of Ipilimumab Combined With Paclitaxel and Carboplatin in Advanced Squamous Non-Small-Cell Lung Cancer. *J Clin Oncol*. 2017; 35:3449–57.  
<https://doi.org/10.1200/JCO.2016.71.7629>  
PMID:28854067
18. Rittmeyer A, Barlesi F, Waterkamp D, Park K, Ciardiello F, von Pawel J, Gadgeel SM, Hida T, Kowalski DM, Dols MC, Cortinovis DL, Leach J, Polikoff J, et al, and OAK Study Group. Atezolizumab versus docetaxel in patients with previously treated non-small-cell lung cancer (OAK): a phase 3, open-label, multicentre randomised controlled trial. *Lancet*. 2017; 389:255–65.  
[https://doi.org/10.1016/S0140-6736\(16\)32517-X](https://doi.org/10.1016/S0140-6736(16)32517-X)  
PMID:27979383
19. Brahmer J, Reckamp KL, Baas P, Crinò L, Eberhardt WE, Poddubskaya E, Antonia S, Pluzanski A, Vokes EE, Holgado E, Waterhouse D, Ready N, Gainor J, et al. Nivolumab versus Docetaxel in Advanced Squamous-Cell Non-Small-Cell Lung Cancer. *N Engl J Med*. 2015; 373:123–35.  
<https://doi.org/10.1056/NEJMoa1504627>  
PMID:26028407
20. Herbst RS, Baas P, Kim DW, Felip E, Pérez-Gracia JL, Han JY, Molina J, Kim JH, Arvis CD, Ahn MJ, Majem M, Fidler MJ, de Castro G Jr, et al. Pembrolizumab versus docetaxel for previously treated, PD-L1-positive, advanced non-small-cell lung cancer (KEYNOTE-010): a randomised controlled trial. *Lancet*. 2016; 387:1540–50.  
[https://doi.org/10.1016/S0140-6736\(15\)01281-7](https://doi.org/10.1016/S0140-6736(15)01281-7)  
PMID:26712084
21. Tomasik B, Bieńkowski M, Braun M, Popat S, Dziadziuszko R. Effectiveness and safety of immunotherapy in NSCLC patients with ECOG PS score  $\geq 2$  - Systematic review and meta-analysis. *Lung Cancer*. 2021; 158:97–106.  
<https://doi.org/10.1016/j.lungcan.2021.06.004>  
PMID:34144405
22. Wagner G, Stollenwerk HK, Klerings I, Pecherstorfer M, Gartlehner G, Singer J. Efficacy and safety of immune checkpoint inhibitors in patients with advanced non-small cell lung cancer (NSCLC): a systematic literature review. *Oncoimmunology*. 2020; 9:1774314.  
<https://doi.org/10.1080/2162402X.2020.1774314>  
PMID:32923134
23. Nishijima TF, Muss HB, Shachar SS, Moschos SJ. Comparison of efficacy of immune checkpoint inhibitors (ICIs) between younger and older patients: A systematic review and meta-analysis. *Cancer Treat Rev*. 2016; 45:30–7.  
<https://doi.org/10.1016/j.ctrv.2016.02.006>  
PMID:26946217
24. Landre T, Des Guetz G, Chouahnia K, Fossey-Diaz V, Culine S. Immune Checkpoint Inhibitors for Patients Aged  $\geq 75$  Years with Advanced Cancer in First- and Second-Line Settings: A Meta-Analysis. *Drugs Aging*. 2020; 37:747–54.  
<https://doi.org/10.1007/s40266-020-00788-5>  
PMID:32681403
25. Nosaki K, Saka H, Hosomi Y, Baas P, de Castro G Jr, Reck M, Wu YL, Brahmer JR, Felip E, Sawada T, Noguchi K, Han SR, Piperdi B, et al. Safety and efficacy of pembrolizumab monotherapy in elderly patients with PD-L1-positive advanced non-small-cell lung cancer: Pooled analysis from the KEYNOTE-010, KEYNOTE-024, and KEYNOTE-042 studies. *Lung Cancer*. 2019; 135:188–95.

<https://doi.org/10.1016/j.lungcan.2019.07.004>  
PMID:[31446994](https://pubmed.ncbi.nlm.nih.gov/31446994/)

26. Bagchi S, Yuan R, Engleman EG. Immune Checkpoint Inhibitors for the Treatment of Cancer: Clinical Impact and Mechanisms of Response and Resistance. *Annu Rev Pathol.* 2021; 16:223–49.  
<https://doi.org/10.1146/annurev-pathol-042020-042741> PMID:[33197221](https://pubmed.ncbi.nlm.nih.gov/33197221/)
27. Mirza N, Duque MA, Dominguez AL, Schrum AG, Dong H, Lustgarten J. B7-H1 expression on old CD8+ T cells negatively regulates the activation of immune responses in aged animals. *J Immunol.* 2010; 184:5466–74.  
<https://doi.org/10.4049/jimmunol.0903561> PMID:[20375308](https://pubmed.ncbi.nlm.nih.gov/20375308/)
28. Wong SK, Nebhan CA, Johnson DB. Impact of Patient Age on Clinical Efficacy and Toxicity of Checkpoint Inhibitor Therapy. *Front Immunol.* 2021; 12:786046.  
<https://doi.org/10.3389/fimmu.2021.786046> PMID:[34868071](https://pubmed.ncbi.nlm.nih.gov/34868071/)
29. Prata LG, Ovsyannikova IG, Tchkonja T, Kirkland JL. Senescent cell clearance by the immune system: Emerging therapeutic opportunities. *Semin Immunol.* 2018; 40:101275.

<https://doi.org/10.1016/j.smim.2019.04.003>  
PMID:[31088710](https://pubmed.ncbi.nlm.nih.gov/31088710/)

30. Raskov H, Orhan A, Christensen JP, Gögenur I. Cytotoxic CD8<sup>+</sup> T cells in cancer and cancer immunotherapy. *Br J Cancer.* 2021; 124:359–67.  
<https://doi.org/10.1038/s41416-020-01048-4> PMID:[32929195](https://pubmed.ncbi.nlm.nih.gov/32929195/)
31. Valentini N, Requejo Cier CJ, Lamarche C. Regulatory T-cell dysfunction and its implication for cell therapy. *Clin Exp Immunol.* 2023; 213:40–9.  
<https://doi.org/10.1093/cei/uxad051> PMID:[37158407](https://pubmed.ncbi.nlm.nih.gov/37158407/)
32. Page MJ, McKenzie JE, Bossuyt PM, Boutron I, Hoffmann TC, Mulrow CD, Shamseer L, Tetzlaff JM, Akl EA, Brennan SE, Chou R, Glanville J, Grimshaw JM, et al. The PRISMA 2020 statement: an updated guideline for reporting systematic reviews. *BMJ.* 2021; 372:n71.  
<https://doi.org/10.1136/bmj.n71> PMID:[33782057](https://pubmed.ncbi.nlm.nih.gov/33782057/)
33. Jadad AR, Moore RA, Carroll D, Jenkinson C, Reynolds DJ, Gavaghan DJ, McQuay HJ. Assessing the quality of reports of randomized clinical trials: is blinding necessary? *Control Clin Trials.* 1996; 17:1–12.  
[https://doi.org/10.1016/0197-2456\(95\)00134-4](https://doi.org/10.1016/0197-2456(95)00134-4) PMID:[8721797](https://pubmed.ncbi.nlm.nih.gov/8721797/)

## SUPPLEMENTARY MATERIALS

### Supplementary Doc

Please browse Full Text version to see the data of Supplementary Doc 1.

**Supplementary Doc 1. Detailed search strategies for each database.**

## Supplementary Figures

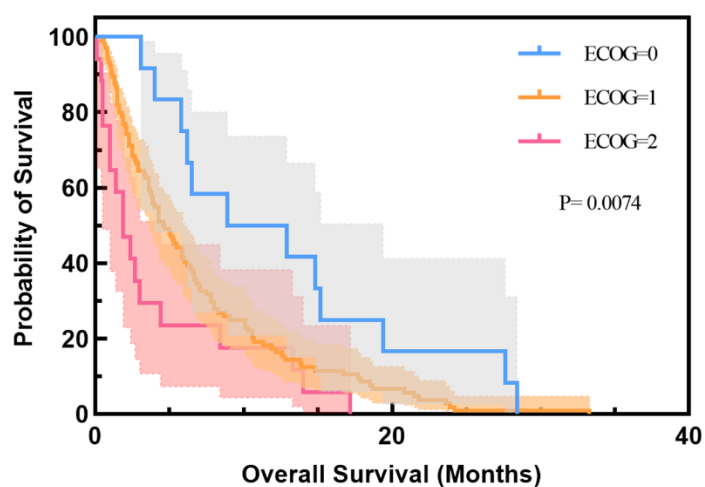

Supplementary Figure 1. Overall survival of NSCLC patients treated with ICIs based on ECOG PS in the cBio database.

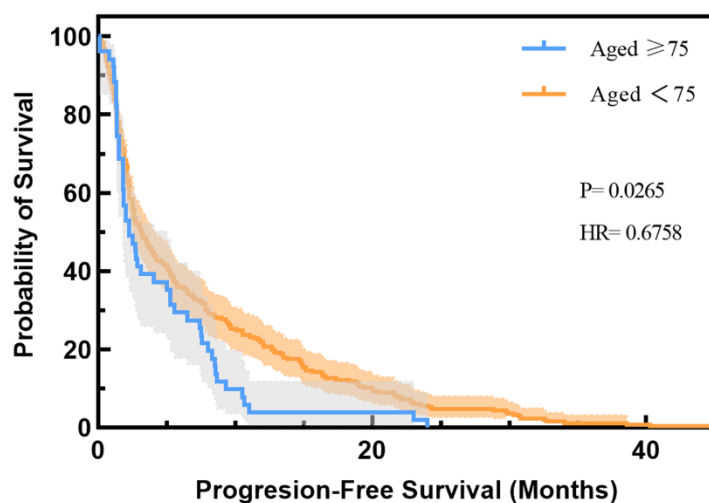

Supplementary Figure 2. Progression-free survival of NSCLC patients treated with ICIs based on age in the cBio database.

**A**

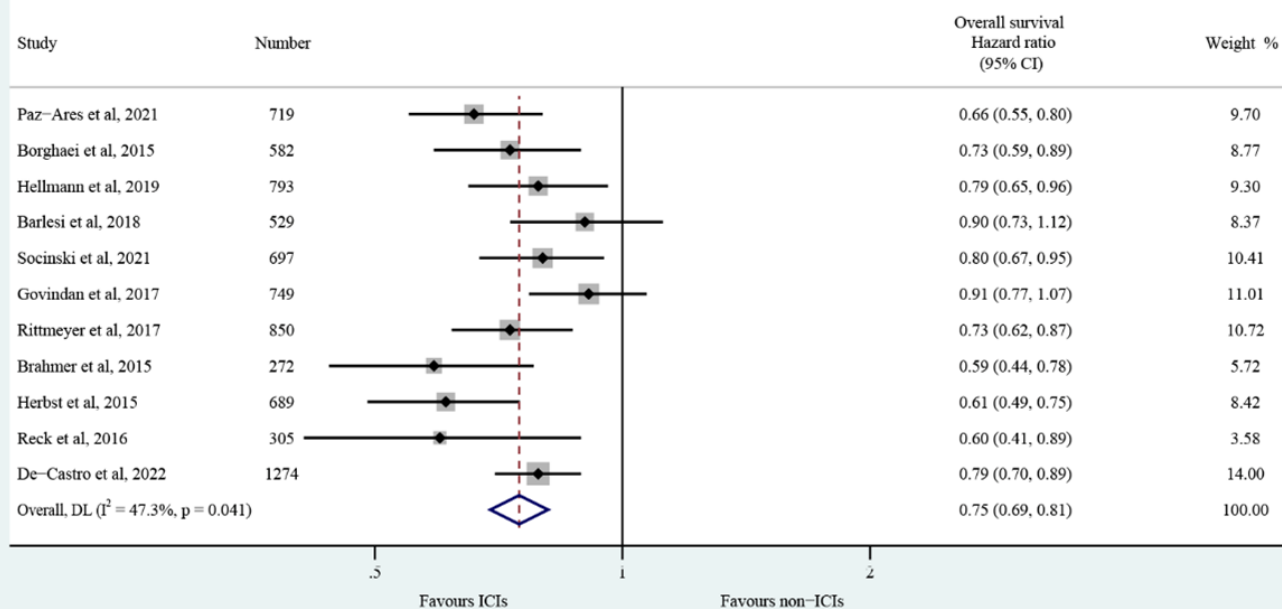

**B**

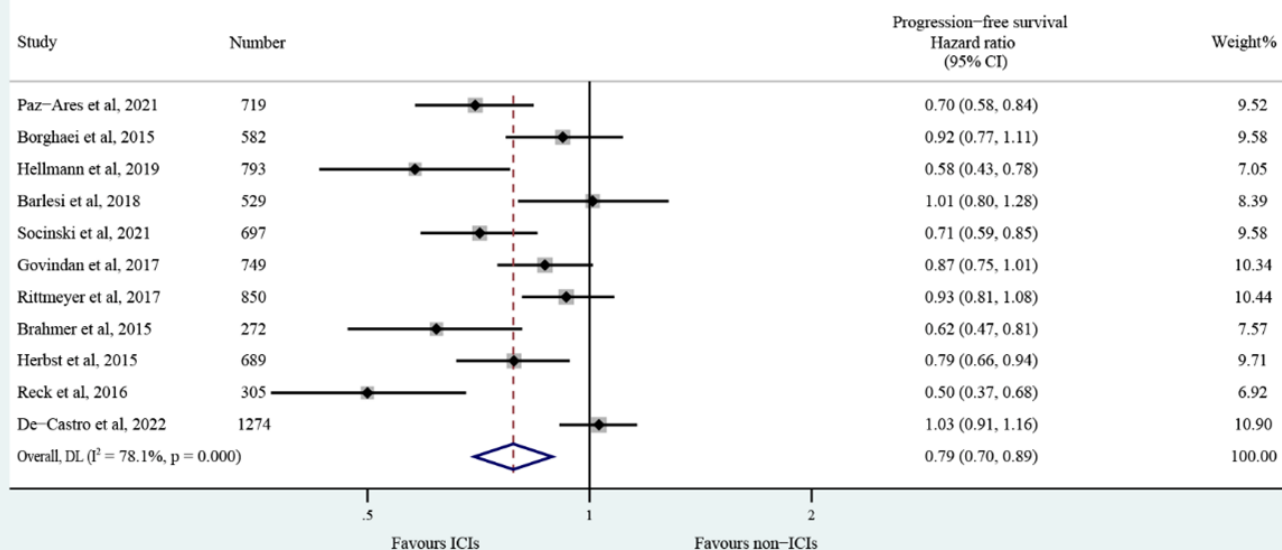

**Supplemental Figure 3.** Forest plot of the hazard ratio for overall survival (A) and progression-free survival (B). CI, confidence interval; ICIs, immune checkpoint inhibitors.

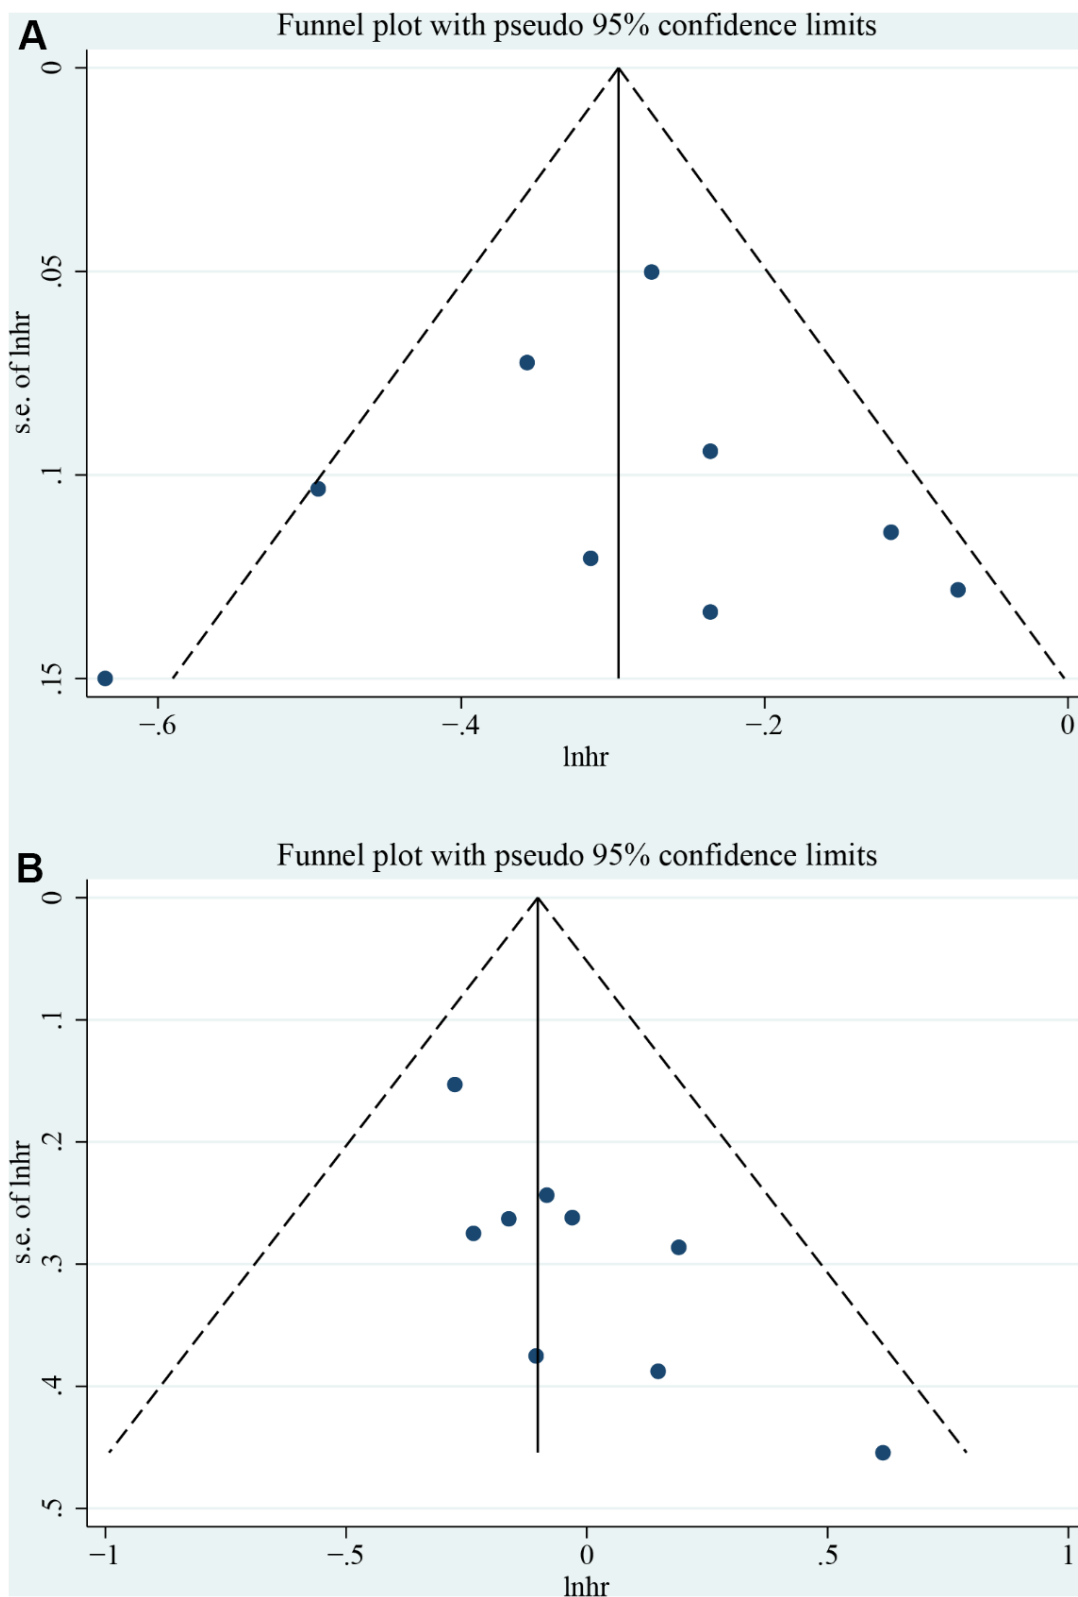

**Supplementary Figure 4.** Funnel plots of efficacy by age < 75 years (A) and ≥ 75 years (B).

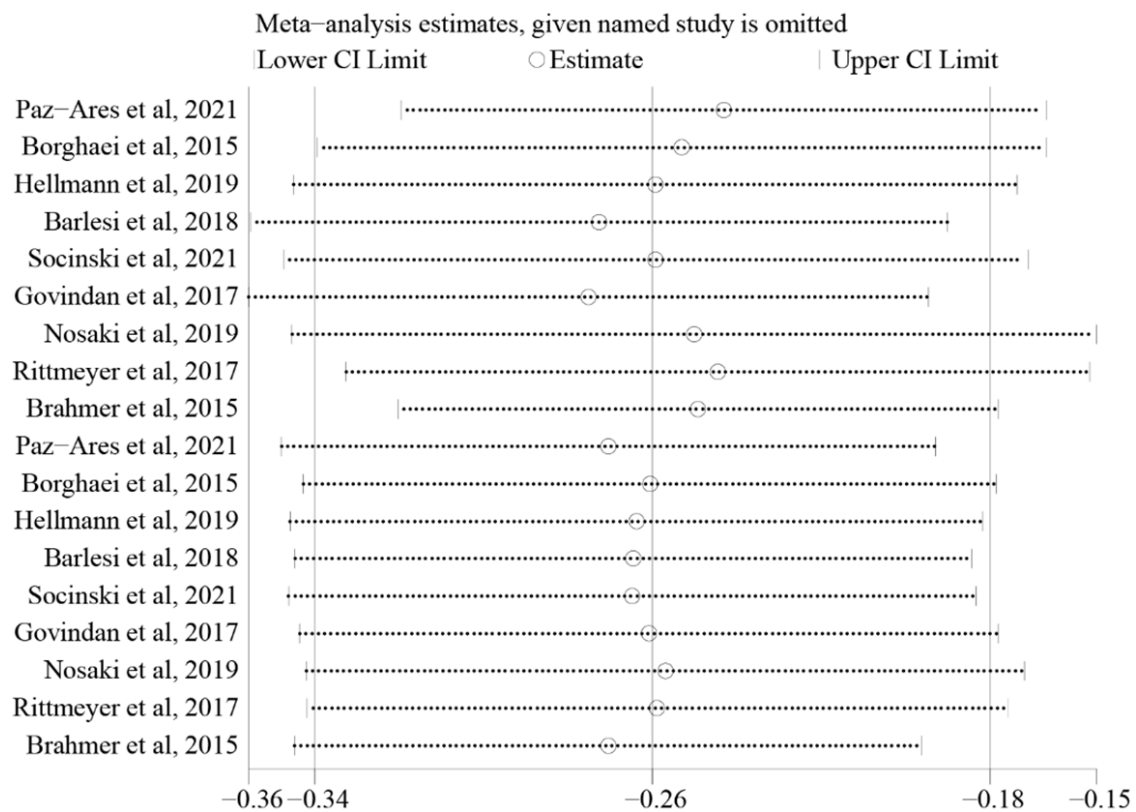

**Supplementary Figure 5. Sensitivity analysis for OS at 75 years of age threshold.** CI, confidence interval.

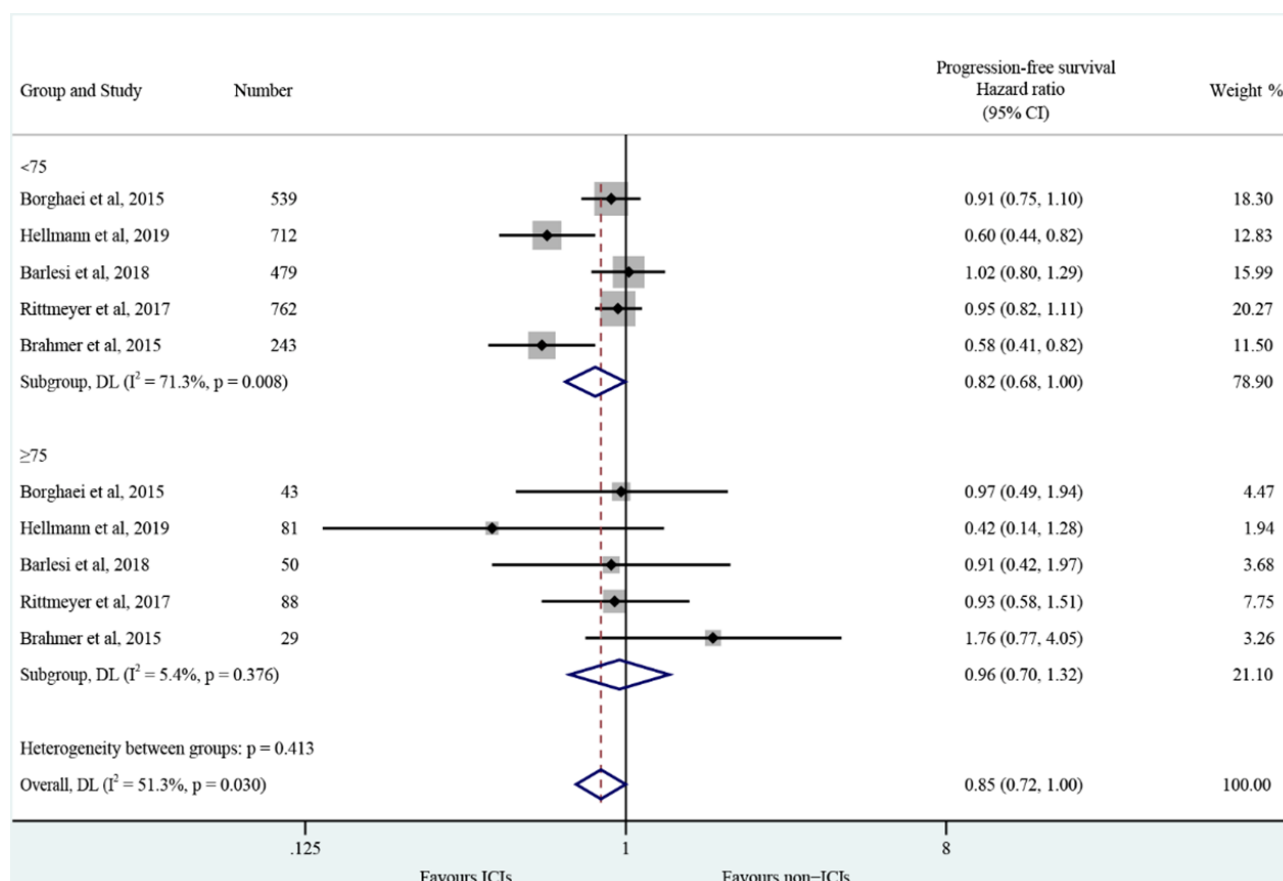

**Supplementary Figure 6. Forest plots of progression-free survival by age < 75 years and ≥ 75 years.** CI, confidence interval; ICIs, immune checkpoint inhibitors.

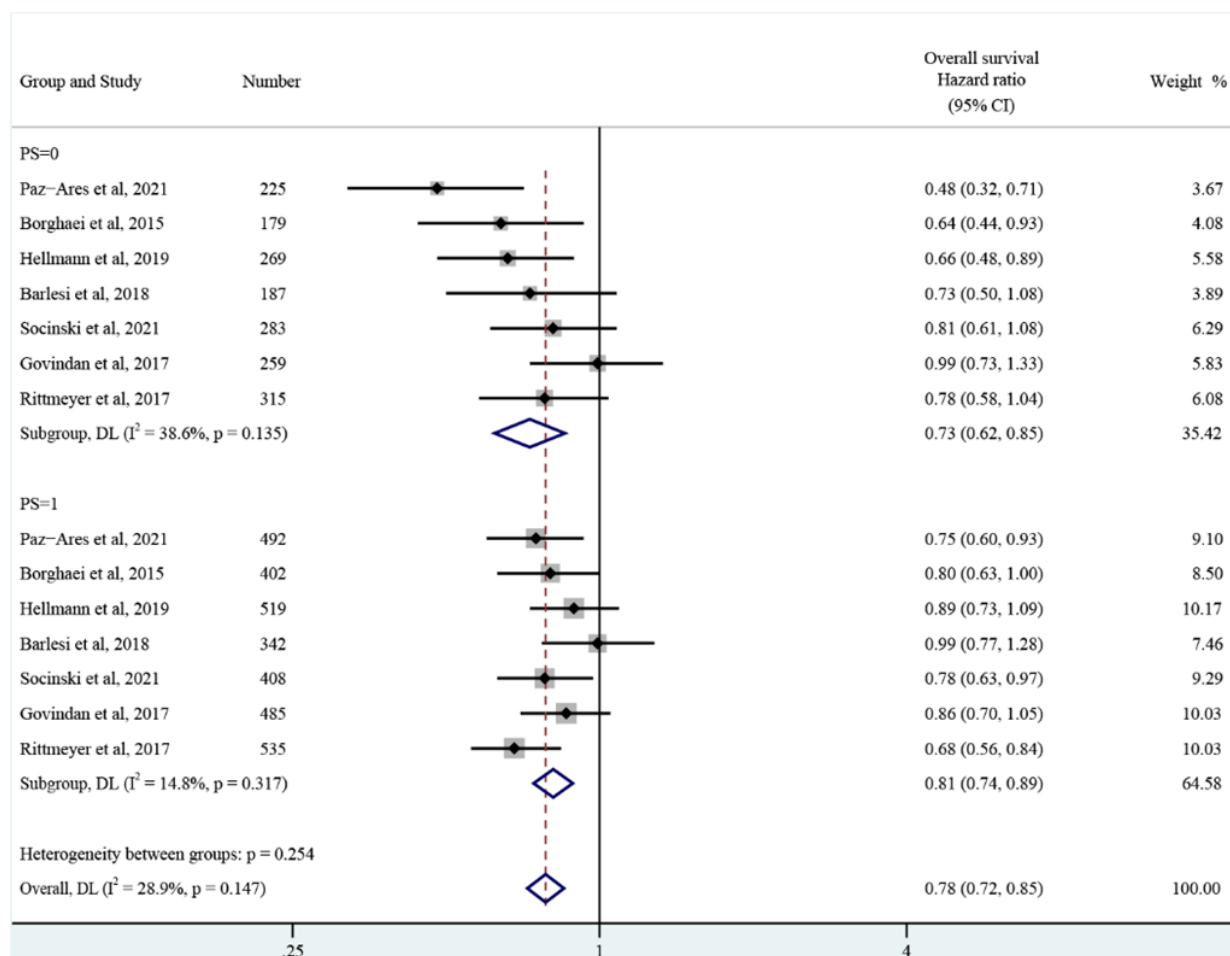

**Supplementary Figure 7. Forest plots of overall survival by PS= 0 and PS= 1.** CI, confidence interval; PS, performance status.

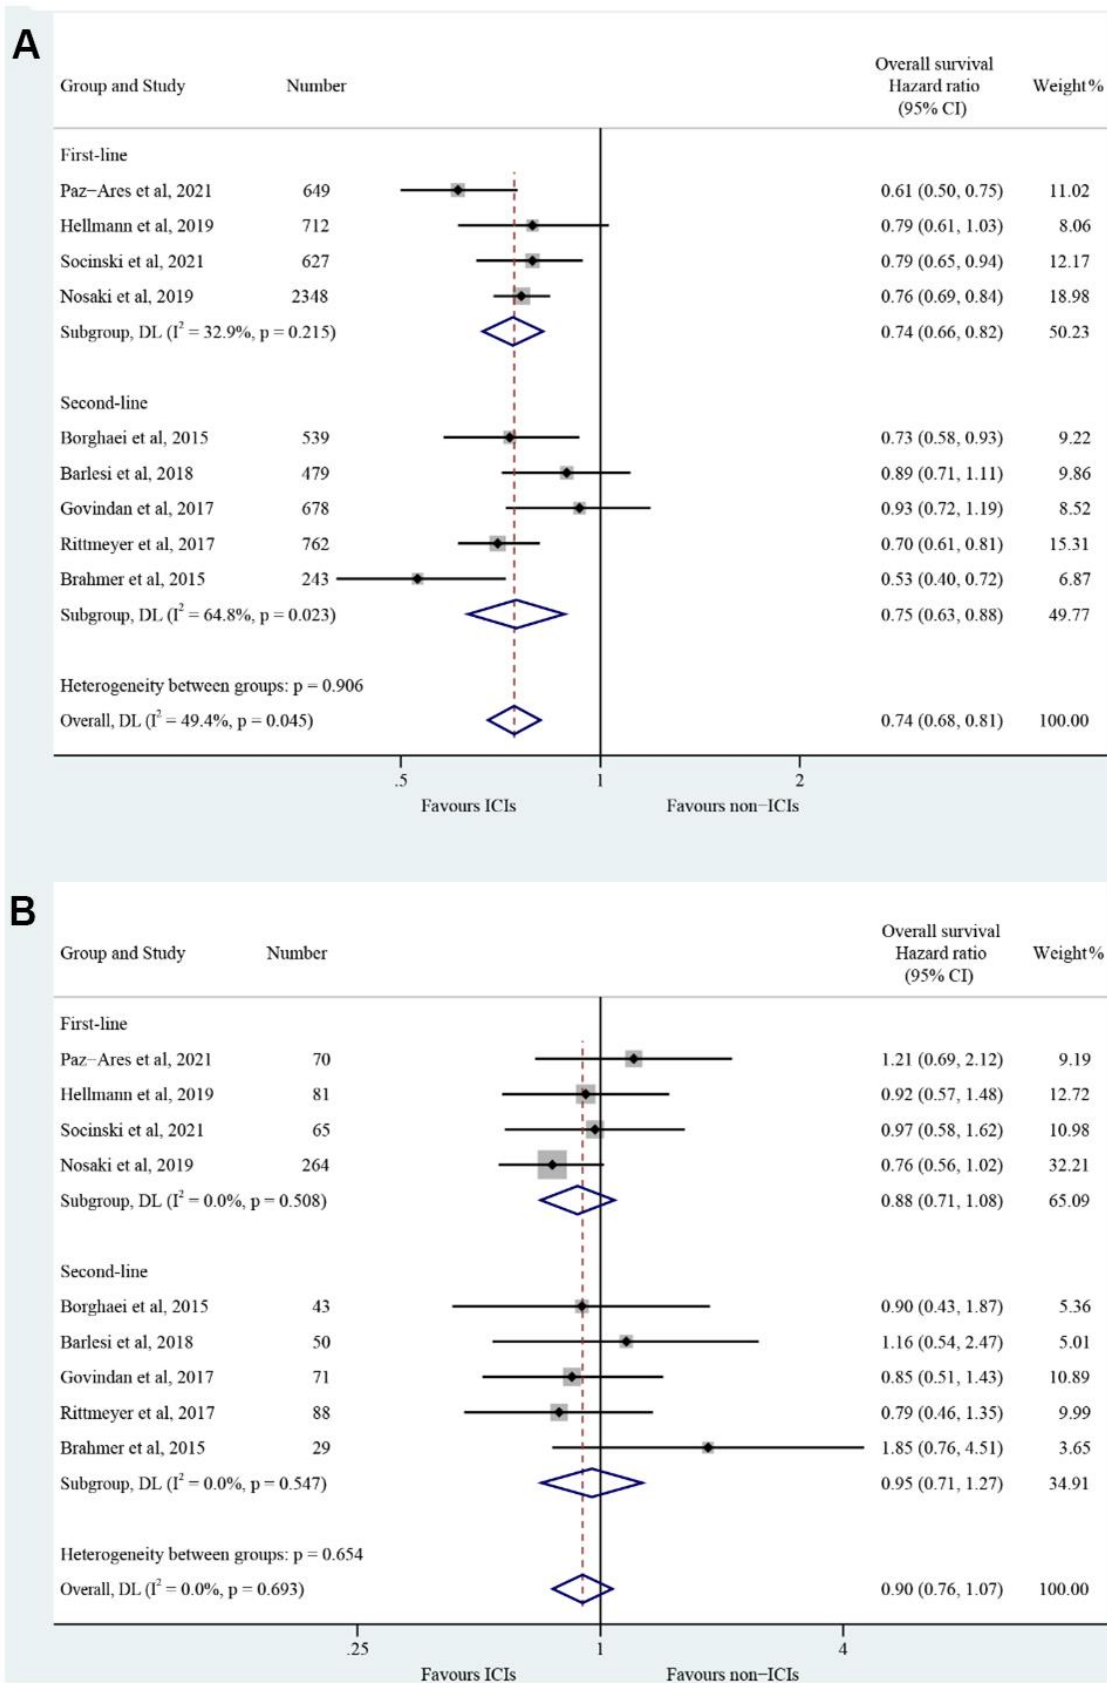

**Supplementary Figure 8.** Forest plots of aged <75 years old (A) and ≥75 years old (B) of overall survival in subgroups by treatment lines. CI, confidence interval; ICIs, immune checkpoint inhibitors.

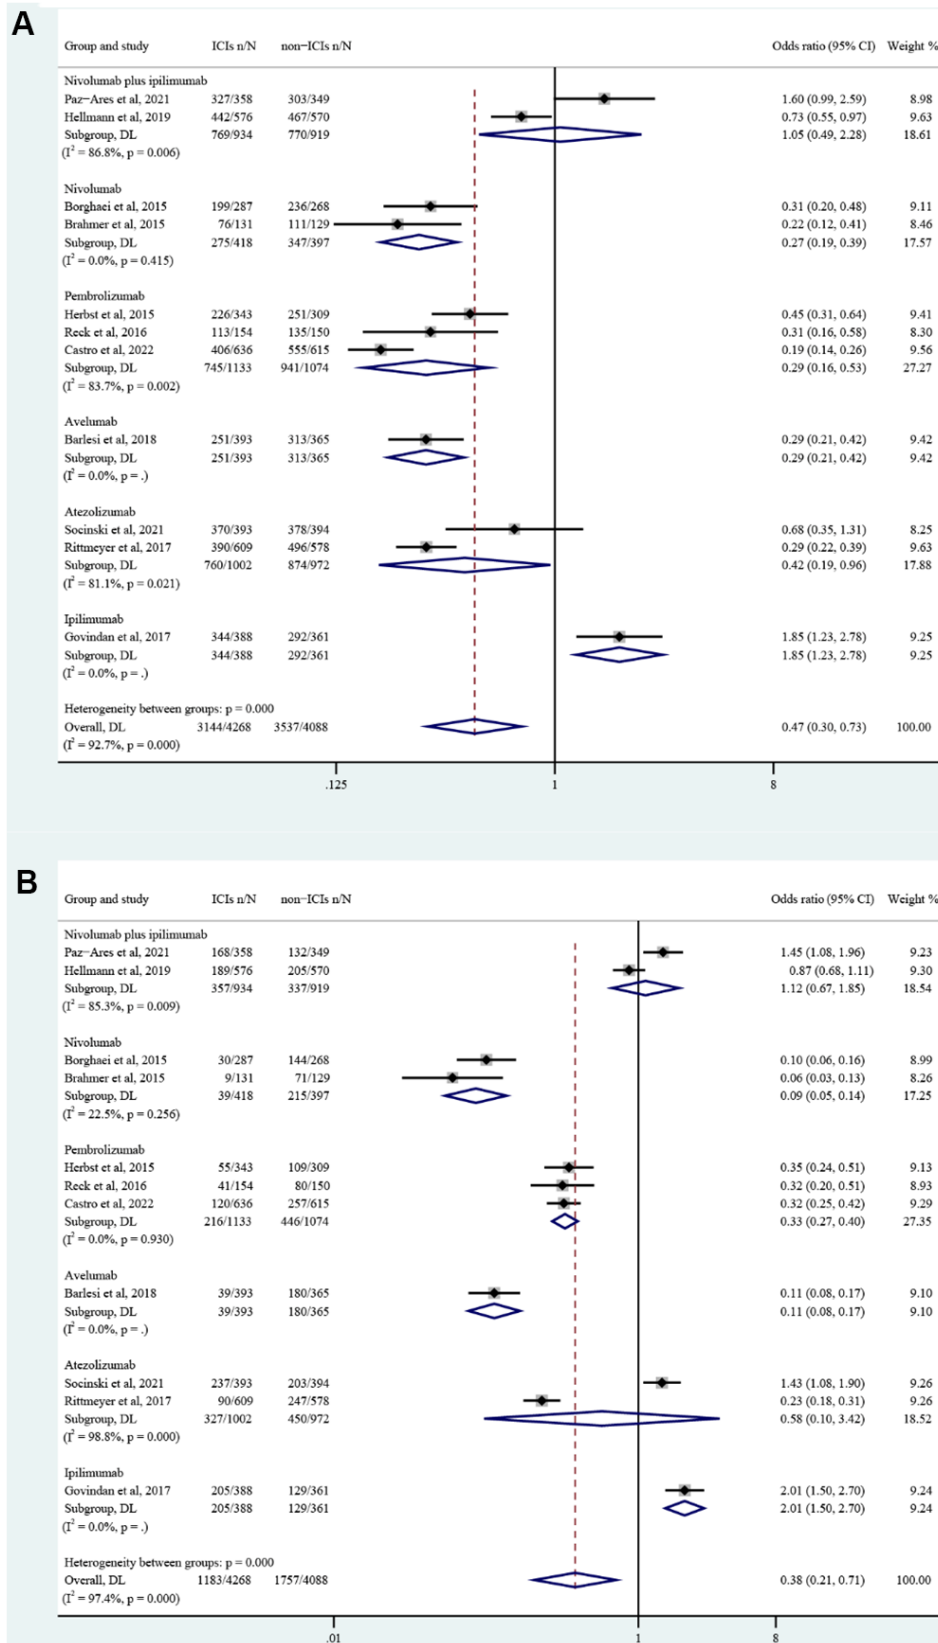

**Supplementary Figure 9.** Forest plots of all-grade (A) and high-grade (B) TRAEs in subgroups by type of ICIs. CI, confidence interval; ICIs, immune checkpoint inhibitors.

## Supplementary Tables

Please browse Full Text version to see the data of Supplementary Table 1.

**Supplementary Table 1. PRISMA 2020 Checklist.**

**Supplementary Table 2. Characteristics and univariate analysis of mPFS for NSCLC patients treated with ICIs from the cBio database.**

| Clinical characteristic    | Patient and percentage (%) | mPFS (months) | p-Value    |
|----------------------------|----------------------------|---------------|------------|
| Total case                 | 296 (100%)                 | 2.9           | -          |
| Age                        |                            |               |            |
| Aged < 75 years old        | 245 (82.8%)                | 3.2           | 0.027*     |
| Aged ≥ 75 years old        | 51 (17.2%)                 | 2.3           |            |
| Sex                        |                            |               |            |
| Male                       | 135 (45.6%)                | 2.9           | 0.940      |
| Female                     | 161 (54.4%)                | 3.0           |            |
| Tumor Histology            |                            |               |            |
| Adenocarcinoma             | 247 (83.4%)                | 3.0           | 0.662      |
| Squamous                   | 49 (16.6%)                 | 2.9           |            |
| ECOG PS                    |                            |               |            |
| ECOG 0                     | 51 (17.2%)                 | 6.8           | < 0.001*** |
| ECOG 1                     | 220 (74.3%)                | 2.7           |            |
| ECOG 2                     | 24 (8.1%)                  | 1.6           |            |
| ECOG 3                     | 1 (0.4%)                   | 0.6           |            |
| Types of ICIs              |                            |               |            |
| Anti-PD-1                  | 174 (58.8%)                | 2.7           | 0.020*     |
| Anti-PD-L1                 | 43 (14.5%)                 | 2.1           |            |
| Anti-CTLA-4                | 77 (26.0%)                 | 4.8           |            |
| Anti-PD-1/L1 + Anti-CTLA-4 | 2 (0.7%)                   | 0.6           |            |

mPFS, median progression-free survival; \* $P < 0.05$ , \*\*\* $P < 0.001$ .

**Supplementary Table 3. Summary of Jadad score by randomization, blinding, and account.**

| Study (Year)           | Randomization | Blinding | Account | Jadad score |
|------------------------|---------------|----------|---------|-------------|
| Paz-Ares et al., 2021  | 2             | 0        | 1       | 3           |
| Borghaei et al., 2015  | 2             | 0        | 1       | 3           |
| Hellmann et al., 2019  | 2             | 0        | 1       | 3           |
| Barlesi et al., 2018   | 2             | 0        | 1       | 3           |
| Socinski et al., 2021  | 2             | 0        | 1       | 3           |
| Govindan et al., 2017  | 2             | 0        | 1       | 3           |
| Rittmeyer et al., 2017 | 2             | 0        | 1       | 3           |
| Brahmer et al., 2015   | 2             | 0        | 1       | 3           |
| Herbst et al., 2015    | 2             | 2        | 1       | 5           |
| Reck et al., 2016      | 2             | 2        | 1       | 5           |
| De-Castro et al., 2022 | 2             | 0        | 1       | 3           |

Notes: A score of 0–2 is considered low, and a score of 3–5 is defined as high quality.

**Supplementary Table 4. Subgroup analysis for different types of ICIs in terms of OS between the non-elderly group (< 75 years) and elderly group (≥ 75 years).**

| Types of ICIs              | Number of studies | HR (95% CI)         |                     |
|----------------------------|-------------------|---------------------|---------------------|
|                            |                   | Age < 75 years      | Age ≥ 75 years      |
| Anti-PD-1/L1 antibody      | 8                 | 0.74 (0.67 to 0.82) | 0.87 (0.71 to 1.07) |
| Anti-CTLA-4 antibody       | 1                 | 0.93 (0.72 to 1.20) | 0.85 (0.51 to 1.42) |
| Anti-PD-1/L1 + Anti-CTLA-4 | 2                 | 0.68 (0.53 to 0.88) | 1.03 (0.72 to 1.48) |

ICIs, immune checkpoint inhibitors; HR, hazard ratio; CI, confidence interval.

**Supplementary Table 5. Summary of factors affecting the efficacy of ICIs.**

| Studies         | Study number                   | Treatment lines | PD-L1 expression and its corresponding mOS |                         |                    |                        | HR (95% CI)      |
|-----------------|--------------------------------|-----------------|--------------------------------------------|-------------------------|--------------------|------------------------|------------------|
|                 |                                |                 | ICIs group                                 | mOS                     | Chemotherapy group | mOS                    |                  |
| Paz-Ares, 2021  | CheckMate 9LA (NCT03215706)    | First-line      | <1%: 135                                   | <1%: 16.8 (13.7-NR)     | <1%:129            | <1%: 9.8 (7.7-13.7)    | 0.62 (0.45-0.85) |
|                 |                                |                 | ≥1%: 203                                   | ≥1%:15.8 (13.8-NR)      | ≥1%:204            | ≥1%:10.9 (9.5-13.2)    | 0.64 (0.50-0.82) |
|                 |                                |                 | 1-49%: 127                                 | 1-49%: 15.4 (12.6-NR)   | 1-49%:106          | 1-49%: 10.4 (8.7-12.4) | 0.61 (0.44-0.84) |
|                 |                                |                 | ≥50%: 76                                   | ≥50%:18.0 (13.1-NR)     | ≥50%:98            | ≥50%:12.6 (9.4-16.9)   | 0.66 (0.44-0.99) |
| Hellmann, 2019  | CheckMate 227 (NCT02477826)    | First-line      | <1%: 187                                   | <1%: 17.2 (12.8-22.0)   | <1%: 186           | <1%: 12.2 (9.2-14.3)   | 0.62 (0.49-0.79) |
|                 |                                |                 | ≥1%: 396                                   | ≥1%: 17.1 (15.0-20.1)   | ≥1%: 397           | ≥1%: 14.9 (12.7-16.7)  | 0.79 (0.65-0.96) |
|                 |                                |                 | ≥50%: 205                                  | ≥50%:21.2 (15.5-38.2)   | ≥50%: 192          | ≥50%:21.2 (15.5-38.2)  | 0.70 (0.55-0.90) |
|                 |                                |                 | ≥1%: 264                                   | ≥1%:11.4 (9.4-13.9)     | ≥1%:265            | ≥1%:10.3 (8.5-13.0)    | 0.90 (0.73-1.12) |
| Barlesi, 2018   | JAVELIN Lung 200 (NCT02395172) | Second-line     | ≥50%: 168                                  | ≥50%:13.6 (10.1-18.5)   | ≥50%:147           | ≥50%:9.2 (5.8-12.4)    | 0.67 (0.51-0.89) |
|                 |                                |                 | ≥80%: 120                                  | ≥80%:17.1 (10.6-25.0)   | ≥80%:106           | ≥80%:9.3 (5.8-13.1)    | 0.59 (0.42-0.83) |
|                 |                                |                 | 1-49%: 195                                 | 1-49%: 12.7 (10.0-17.3) | 1-49%: 152         | 1-49%: 8.5 (7.5-9.8)   | 0.76 (0.60-0.96) |
|                 |                                |                 | ≥50%: 151                                  | ≥50%:17.3 (11.8-NR)     | ≥50%: 191          | ≥50%:8.2 (6.4-10.7)    | 0.53 (0.40-0.70) |
| De-Castro, 2022 | KEYNOTE 042 (NCT02220894)      | First-line      | ≥1%: 637                                   | ≥1%:16.4 (14.0-19.6)    | ≥1%: 637           | ≥1%:12.1 (11.3-13.3)   | 0.79 (0.70-0.89) |
|                 |                                |                 | ≥20%: 413                                  | ≥20%:18.0 (15.5-21.5)   | ≥20%: 405          | ≥20%:13.0 (11.6-15.3)  | 0.75 (0.64-0.87) |
|                 |                                |                 | ≥50%: 299                                  | ≥50%:20.0 (15.9-24.2)   | ≥50%: 300          | ≥50%:12.2 (10.4-14.6)  | 0.68 (0.57-0.81) |
|                 |                                |                 |                                            |                         |                    |                        |                  |

mOS, median overall survival; ICIs, immune checkpoint inhibitors; HR, hazard ratio; CI, confidence interval; NR, not reached.

## Supplementary Appendix

Please browse Full Text version to see the data of Supplementary Appendix 1.

**Supplementary Appendix 1. Raw data from the cBio website containing 336 NSCLC patients treated with ICIs.**
