# Supplementary material for: The efficacy of immune checkpoint inhibitors is limited in elderly NSCLC: a retrospective efficacy study and meta-analysis
Source: Aging (Albany NY). 2023 Dec 19;15(24):15025–49. doi: 10.18632/aging.205328 (PMC10781456; doi:10.18632/aging.205328)
Supplement: Supplementary Appendix 1 [file aging-15-205328-s005.xlsx]

## Sheet: 原始数据
Supplementary Appendix 1. Raw data from the cBio website containing 336 NSCLC patients treated with ICIs.
Samples	Tumor histology	Sex	Age (yrs)	ECOG performance status	Overall Survival (Months)	Progress Free Survival (Months)	Drug
mskcc_2015_30	Adenocarcinoma	Male	80	-	-	8.3	Pembrolizumab
mskcc_2015_20	Adenocarcinoma	Female	78	-	-	10.4	Pembrolizumab
mskcc_2015_7	Adenocarcinoma	Female	76	-	-	1.9	Pembrolizumab
mskcc_2015_22	Adenocarcinoma	Female	73	-	-	6.5	Pembrolizumab
mskcc_2015_27	Adenocarcinoma	Male	71	-	-	2.1	Pembrolizumab
mskcc_2015_31	Adenocarcinoma	Female	71	-	-	4.1	Pembrolizumab
mskcc_2015_19	Squamous	Male	68	-	-	27.3	Pembrolizumab
mskcc_2015_4	Adenocarcinoma	Female	68	-	-	8.3	Pembrolizumab
mskcc_2015_3	Adenocarcinoma	Male	66	-	-	2.1	Pembrolizumab
mskcc_2015_5	Adenocarcinoma	Male	66	-	-	14.6	Pembrolizumab
mskcc_2015_11	Adenocarcinoma	Female	65	-	-	4.2	Pembrolizumab
mskcc_2015_33	Adenocarcinoma	Male	64	-	-	1.8	Pembrolizumab
mskcc_2015_10	Adenocarcinoma	Female	64	-	-	12.6	Pembrolizumab
mskcc_2015_12	Adenocarcinoma	Female	64	-	-	8.1	Pembrolizumab
mskcc_2015_25	Adenocarcinoma	Male	63	-	-	1.4	Pembrolizumab
mskcc_2015_1	Adenocarcinoma	Female	63	-	-	8.4	Pembrolizumab
mskcc_2015_2	Adenocarcinoma	Female	63	-	-	14.7	Pembrolizumab
mskcc_2015_28	Adenocarcinoma	Female	62	-	-	3.5	Pembrolizumab
mskcc_2015_18	Adenocarcinoma	Female	61	-	-	9.8	Pembrolizumab
mskcc_2015_16	Adenocarcinoma	Male	60	-	-	3.3	Pembrolizumab
mskcc_2015_6	Adenocarcinoma	Female	60	-	-	16.6	Pembrolizumab
mskcc_2015_23	Squamous	Male	59	-	-	1.9	Pembrolizumab
mskcc_2015_15	Adenocarcinoma	Male	59	-	-	8.4	Pembrolizumab
mskcc_2015_21	Adenocarcinoma	Male	59	-	-	8.3	Pembrolizumab
mskcc_2015_8	Squamous	Male	57	-	-	4	Pembrolizumab
mskcc_2015_9	Adenocarcinoma	Male	57	-	-	14.5	Pembrolizumab
mskcc_2015_14	Adenocarcinoma	Female	57	-	-	4.4	Pembrolizumab
mskcc_2015_34	Adenocarcinoma	Female	57	-	-	6.3	Pembrolizumab
mskcc_2015_13	Adenocarcinoma	Male	56	-	-	1.8	Pembrolizumab
mskcc_2015_29	Adenocarcinoma	Female	56	-	-	6.3	Pembrolizumab
mskcc_2015_17	Squamous	Female	51	-	-	3.4	Pembrolizumab
mskcc_2015_24	Adenocarcinoma	Male	50	-	-	1.9	Pembrolizumab
mskcc_2015_26	Adenocarcinoma	Male	49	-	-	1.9	Pembrolizumab
mskcc_2015_32	Adenocarcinoma	Female	41	-	-	1.9	Pembrolizumab
P-0026958	Adenocarcinoma	Female	73	3	-	0.6	Pembrolizumab
P-0027343	Adenocarcinoma	Male	93	2	0.1	0.1	Pembrolizumab
P-0018763	Adenocarcinoma	Male	83	2	-	2	Pembrolizumab
P-0034908	Squamous	Male	76	2	-	10.7	Pembrolizumab
P-0018511	Adenocarcinoma	Female	74	2	1.9	1.2	Pembrolizumab
P-0019599	Adenocarcinoma	Male	73	2	0.5	0.5	Pembrolizumab
P-0017613	Adenocarcinoma	Female	68	2	14	7	Pembrolizumab
P-0032455	Adenocarcinoma	Female	64	2	-	14.8	Pembrolizumab
P-0027088	Adenocarcinoma	Male	45	2	1	1	Pembrolizumab
P-0014293	Adenocarcinoma	Male	88	1	-	10.5	Pembrolizumab
P-0031727	Adenocarcinoma	Female	84	1	-	19.7	Pembrolizumab
P-0019298	Adenocarcinoma	Female	83	1	4.6	1.4	Pembrolizumab
P-0016016	Adenocarcinoma	Female	82	1	6.2	2	Pembrolizumab
P-0027855	Adenocarcinoma	Male	81	1	2.9	2.9	Pembrolizumab
P-0017484	Squamous	Male	80	1	-	1.9	Pembrolizumab
P-0014207	Adenocarcinoma	Male	78	1	3.6	1.9	Pembrolizumab
P-0028204	Squamous	Male	77	1	-	1.3	Pembrolizumab
P-0032126	Adenocarcinoma	Female	77	1	10.6	8.6	Pembrolizumab
P-0022301	Squamous	Male	76	1	3.9	2.5	Pembrolizumab
P-0026574	Squamous	Male	76	1	-	9.3	Pembrolizumab
P-0007493	Adenocarcinoma	Male	76	1	-	5.6	Pembrolizumab
P-0029593	Adenocarcinoma	Male	75	1	-	8.7	Pembrolizumab
P-0030654	Squamous	Female	75	1	5.1	1.2	Pembrolizumab
P-0022808	Adenocarcinoma	Female	75	1	3.6	2.8	Pembrolizumab
P-0039832	Adenocarcinoma	Female	75	1	-	11	Pembrolizumab
P-0014061	Adenocarcinoma	Female	74	1	-	9.6	Pembrolizumab
P-0015937	Adenocarcinoma	Female	73	1	33.3	2.6	Pembrolizumab
P-0021034	Adenocarcinoma	Female	73	1	-	10.6	Pembrolizumab
P-0027455	Squamous	Male	72	1	-	15.1	Pembrolizumab
P-0020140	Adenocarcinoma	Male	72	1	5.5	2.3	Pembrolizumab
P-0011537	Squamous	Male	70	1	-	15.6	Pembrolizumab
P-0026121	Adenocarcinoma	Male	70	1	8.3	5.5	Pembrolizumab
P-0040848	Squamous	Female	70	1	-	11.8	Pembrolizumab
P-0023562	Adenocarcinoma	Female	70	1	13.8	13.8	Pembrolizumab
P-0015213	Adenocarcinoma	Male	69	1	2.3	2.3	Pembrolizumab
P-0023926	Adenocarcinoma	Female	69	1	0.8	0.8	Pembrolizumab
P-0029148	Adenocarcinoma	Male	68	1	-	9.7	Pembrolizumab
P-0025657	Squamous	Female	68	1	-	2.1	Pembrolizumab
P-0018078	Adenocarcinoma	Female	68	1	6.4	1.1	Pembrolizumab
P-0019914	Adenocarcinoma	Female	68	1	-	3	Pembrolizumab
P-0025465	Squamous	Male	67	1	-	12.7	Pembrolizumab
P-0023598	Adenocarcinoma	Female	67	1	-	3.6	Pembrolizumab
P-0027726	Adenocarcinoma	Female	66	1	-	9.7	Pembrolizumab
P-0028723	Adenocarcinoma	Male	65	1	-	14.9	Pembrolizumab
P-0044186	Adenocarcinoma	Male	65	1	-	19.4	Pembrolizumab
P-0020643	Squamous	Female	65	1	-	9	Pembrolizumab
P-0031112	Squamous	Female	64	1	21.5	5.7	Pembrolizumab
P-0024980	Adenocarcinoma	Female	64	1	2.5	2	Pembrolizumab
P-0018979	Adenocarcinoma	Female	64	1	4.3	1.4	Pembrolizumab
P-0018599	Squamous	Male	63	1	1.2	1.2	Pembrolizumab
P-0020755	Adenocarcinoma	Female	63	1	18.5	1.3	Pembrolizumab
P-0010514	Adenocarcinoma	Female	63	1	-	6.9	Pembrolizumab
P-0029298	Squamous	Male	62	1	5.9	2.5	Pembrolizumab
P-0032182	Adenocarcinoma	Female	62	1	-	5	Pembrolizumab
P-0022949	Adenocarcinoma	Male	61	1	-	2.7	Pembrolizumab
P-0028320	Adenocarcinoma	Female	60	1	1.3	1.2	Pembrolizumab
P-0018960	Adenocarcinoma	Female	59	1	1.5	0.7	Pembrolizumab
P-0033239	Adenocarcinoma	Female	59	1	-	4.2	Pembrolizumab
P-0009476	Adenocarcinoma	Female	58	1	0.7	0.7	Pembrolizumab
P-0027133	Adenocarcinoma	Female	58	1	1.9	1.9	Pembrolizumab
P-0026289	Adenocarcinoma	Female	58	1	-	16.6	Pembrolizumab
P-0012679	Adenocarcinoma	Female	57	1	1.1	1.1	Pembrolizumab
P-0021291	Adenocarcinoma	Female	56	1	-	22.8	Pembrolizumab
P-0021231	Squamous	Male	55	1	3.7	2.1	Pembrolizumab
P-0024421	Adenocarcinoma	Female	54	1	4.3	1.5	Pembrolizumab
P-0003250	Adenocarcinoma	Female	54	1	-	0.9	Pembrolizumab
P-0014885	Adenocarcinoma	Female	54	1	-	2.6	Pembrolizumab
P-0019647	Adenocarcinoma	Male	53	1	-	1.9	Pembrolizumab
P-0014065	Adenocarcinoma	Female	53	1	-	20	Pembrolizumab
P-0006713	Adenocarcinoma	Female	52	1	-	8.5	Pembrolizumab
P-0025777	Adenocarcinoma	Female	49	1	2	1.6	Pembrolizumab
P-0018366	Adenocarcinoma	Male	48	1	23.9	5.8	Pembrolizumab
P-0018722	Adenocarcinoma	Female	44	1	-	18.8	Pembrolizumab
P-0021797	Adenocarcinoma	Male	38	1	-	18.3	Pembrolizumab
P-0003247	Adenocarcinoma	Female	76	0	-	12.5	Pembrolizumab
P-0022103	Adenocarcinoma	Female	72	0	-	2.5	Pembrolizumab
P-0008422	Squamous	Male	69	0	-	21.9	Pembrolizumab
P-0019390	Adenocarcinoma	Male	69	0	14.8	1.9	Pembrolizumab
P-0029975	Squamous	Male	65	0	-	11.4	Pembrolizumab
P-0014285	Adenocarcinoma	Female	62	0	-	12	Pembrolizumab
P-0025598	Adenocarcinoma	Female	58	0	5.8	2.5	Pembrolizumab
P-0007121	Adenocarcinoma	Female	58	0	-	20.5	Pembrolizumab
P-0033978	Adenocarcinoma	Female	51	0	-	6.2	Pembrolizumab
P-0021470	Adenocarcinoma	Male	47	0	15.2	2.5	Pembrolizumab
P-0025245	Adenocarcinoma	Male	43	0	6.2	3.5	Pembrolizumab
mskcc_2018p70	Squamous	Male	83	1	-	1.3	PD-1 + CTLA-4
mskcc_2018p12	Adenocarcinoma	Male	82	1	-	26.2	PD-1 + CTLA-4
mskcc_2018p66	Squamous	Male	76	1	-	0.1	PD-1 + CTLA-4
mskcc_2018p30	Squamous	Male	75	1	-	21.2	PD-1 + CTLA-4
mskcc_2018p63	Squamous	Male	75	1	-	21.9	PD-1 + CTLA-4
mskcc_2018p23	Adenocarcinoma	Female	75	1	-	8	PD-1 + CTLA-4
mskcc_2018p40	Adenocarcinoma	Male	73	1	-	8.1	PD-1 + CTLA-4
mskcc_2018p10	Squamous	Male	72	1	-	5.4	PD-1 + CTLA-4
mskcc_2018p22	Adenocarcinoma	Male	72	1	-	2.5	PD-1 + CTLA-4
mskcc_2018p61	Adenocarcinoma	Male	72	1	-	1.7	PD-1 + CTLA-4
mskcc_2018p55	Adenocarcinoma	Male	71	1	-	2.1	PD-1 + CTLA-4
mskcc_2018p67	Squamous	Female	71	1	-	2.5	PD-1 + CTLA-4
mskcc_2018p71	Adenocarcinoma	Female	71	1	-	3.5	PD-1 + CTLA-4
mskcc_2018p46	Squamous	Male	69	1	-	3.3	PD-1 + CTLA-4
mskcc_2018p18	Adenocarcinoma	Female	69	1	-	29.7	PD-1 + CTLA-4
mskcc_2018p65	Adenocarcinoma	Female	69	1	-	4.8	PD-1 + CTLA-4
mskcc_2018p9	Adenocarcinoma	Female	68	1	-	7.8	PD-1 + CTLA-4
mskcc_2018p17	Adenocarcinoma	Female	68	1	-	12.1	PD-1 + CTLA-4
mskcc_2018p39	Adenocarcinoma	Female	68	1	-	0.1	PD-1 + CTLA-4
mskcc_2018p16	Adenocarcinoma	Male	67	1	-	3.6	PD-1 + CTLA-4
mskcc_2018p31	Adenocarcinoma	Female	67	1	-	2.3	PD-1 + CTLA-4
mskcc_2018p47	Squamous	Male	66	1	-	2.1	PD-1 + CTLA-4
mskcc_2018p38	Adenocarcinoma	Male	66	1	-	7.8	PD-1 + CTLA-4
mskcc_2018p35	Adenocarcinoma	Female	66	1	-	2.3	PD-1 + CTLA-4
mskcc_2018p4	Squamous	Male	64	1	-	3.8	PD-1 + CTLA-4
mskcc_2018p44	Squamous	Male	63	1	-	0.3	PD-1 + CTLA-4
mskcc_2018p50	Squamous	Male	63	1	-	10.6	PD-1 + CTLA-4
mskcc_2018p68	Adenocarcinoma	Male	61	1	-	8	PD-1 + CTLA-4
mskcc_2018p3	Adenocarcinoma	Female	61	1	-	1.5	PD-1 + CTLA-4
mskcc_2018p26	Adenocarcinoma	Female	60	1	-	23	PD-1 + CTLA-4
mskcc_2018p42	Adenocarcinoma	Male	59	1	-	3.9	PD-1 + CTLA-4
mskcc_2018p43	Adenocarcinoma	Female	58	1	-	5.1	PD-1 + CTLA-4
mskcc_2018p7	Squamous	Male	56	1	-	38.6	PD-1 + CTLA-4
mskcc_2018p45	Squamous	Male	56	1	-	2.2	PD-1 + CTLA-4
mskcc_2018p51	Adenocarcinoma	Female	56	1	-	29.9	PD-1 + CTLA-4
mskcc_2018p58	Adenocarcinoma	Female	56	1	-	1.9	PD-1 + CTLA-4
mskcc_2018p15	Adenocarcinoma	Female	53	1	-	0.1	PD-1 + CTLA-4
mskcc_2018p48	Squamous	Male	51	1	-	2.3	PD-1 + CTLA-4
mskcc_2018p75	Adenocarcinoma	Female	51	1	-	14.9	PD-1 + CTLA-4
mskcc_2018p32	Adenocarcinoma	Female	50	1	-	19	PD-1 + CTLA-4
mskcc_2018p72	Adenocarcinoma	Male	47	1	-	2.3	PD-1 + CTLA-4
mskcc_2018p53	Adenocarcinoma	Female	46	1	-	1.4	PD-1 + CTLA-4
mskcc_2018p14	Adenocarcinoma	Female	43	1	-	1.7	PD-1 + CTLA-4
mskcc_2018p74	Adenocarcinoma	Male	42	1	-	8	PD-1 + CTLA-4
mskcc_2018p54	Adenocarcinoma	Female	42	1	-	5.2	PD-1 + CTLA-4
mskcc_2018p62	Adenocarcinoma	Male	87	0	-	23	PD-1 + CTLA-4
mskcc_2018p24	Adenocarcinoma	Female	85	0	-	2.3	PD-1 + CTLA-4
mskcc_2018p28	Adenocarcinoma	Female	77	0	-	17.1	PD-1 + CTLA-4
mskcc_2018p13	Adenocarcinoma	Male	76	0	-	24	PD-1 + CTLA-4
mskcc_2018p34	Adenocarcinoma	Male	76	0	-	22.3	PD-1 + CTLA-4
mskcc_2018p33	Squamous	Male	74	0	-	21.6	PD-1 + CTLA-4
mskcc_2018p21	Adenocarcinoma	Female	74	0	-	21.6	PD-1 + CTLA-4
mskcc_2018p64	Adenocarcinoma	Female	74	0	-	20	PD-1 + CTLA-4
mskcc_2018p60	Adenocarcinoma	Female	73	0	-	24.3	PD-1 + CTLA-4
mskcc_2018p2	Squamous	Male	72	0	-	6.8	PD-1 + CTLA-4
mskcc_2018p1	Adenocarcinoma	Female	70	0	-	1.4	PD-1 + CTLA-4
mskcc_2018p52	Adenocarcinoma	Male	67	0	-	30.3	PD-1 + CTLA-4
mskcc_2018p6	Adenocarcinoma	Female	67	0	-	3.7	PD-1 + CTLA-4
mskcc_2018p69	Adenocarcinoma	Female	67	0	-	2.6	PD-1 + CTLA-4
mskcc_2018p25	Adenocarcinoma	Male	65	0	-	22.1	PD-1 + CTLA-4
mskcc_2018p56	Adenocarcinoma	Female	63	0	-	6.5	PD-1 + CTLA-4
mskcc_2018p36	Adenocarcinoma	Female	62	0	-	13.3	PD-1 + CTLA-4
mskcc_2018p57	Adenocarcinoma	Female	61	0	-	2	PD-1 + CTLA-4
mskcc_2018p19	Adenocarcinoma	Male	59	0	-	28.8	PD-1 + CTLA-4
mskcc_2018p8	Adenocarcinoma	Male	58	0	-	3	PD-1 + CTLA-4
mskcc_2018p11	Adenocarcinoma	Female	58	0	-	7.8	PD-1 + CTLA-4
mskcc_2018p5	Adenocarcinoma	Male	57	0	-	7.6	PD-1 + CTLA-4
mskcc_2018p37	Adenocarcinoma	Female	57	0	-	19	PD-1 + CTLA-4
mskcc_2018p73	Adenocarcinoma	Female	57	0	-	16.5	PD-1 + CTLA-4
mskcc_2018p59	Adenocarcinoma	Female	56	0	-	2.3	PD-1 + CTLA-4
mskcc_2018p27	Adenocarcinoma	Male	55	0	-	4.1	PD-1 + CTLA-4
mskcc_2018p49	Adenocarcinoma	Female	55	0	-	11.7	PD-1 + CTLA-4
mskcc_2018p20	Adenocarcinoma	Male	54	0	-	1.4	PD-1 + CTLA-4
mskcc_2018p41	Adenocarcinoma	Male	53	0	-	13.5	PD-1 + CTLA-4
mskcc_2018p29	Adenocarcinoma	Female	50	0	-	2.6	PD-1 + CTLA-4
P-0016542	Squamous	Male	79	2	1.4	1.4	Nivolumab
P-0008878	Adenocarcinoma	Male	76	2	13.3	2.7	Nivolumab
P-0027259	Squamous	Male	69	2	1.9	1.6	Nivolumab
P-0017184	Adenocarcinoma	Female	69	2	0.5	0.5	Nivolumab
P-0021696	Adenocarcinoma	Female	69	2	2.7	1.6	Nivolumab
P-0000302	Adenocarcinoma	Male	67	2	-	32.7	Nivolumab
P-0027576	Adenocarcinoma	Male	65	2	3	0.8	Nivolumab
P-0023408	Adenocarcinoma	Female	64	2	1	1	Nivolumab
P-0015348	Adenocarcinoma	Male	62	2	17.2	2.1	Nivolumab
P-0025917	Adenocarcinoma	Female	62	2	4.4	1.7	Nivolumab
P-0002794	Adenocarcinoma	Female	61	2	-	14.8	Nivolumab
P-0025354	Adenocarcinoma	Female	60	2	-	11.1	Nivolumab
P-0000239	Adenocarcinoma	Male	83	1	2.1	1.8	Nivolumab
P-0010507	Adenocarcinoma	Male	83	1	-	4.1	Nivolumab
P-0018557	Adenocarcinoma	Female	83	1	1.6	1.2	Nivolumab
P-0026521	Adenocarcinoma	Male	81	1	-	1.8	Nivolumab
P-0017781	Adenocarcinoma	Male	80	1	1.5	1.5	Nivolumab
P-0018517	Adenocarcinoma	Male	80	1	2.3	2.3	Nivolumab
P-0022011	Adenocarcinoma	Male	80	1	13.9	7.5	Nivolumab
P-0023260	Adenocarcinoma	Male	79	1	1.5	1.5	Nivolumab
P-0009017	Adenocarcinoma	Male	77	1	-	8.5	Nivolumab
P-0016646	Adenocarcinoma	Male	76	1	4.3	1.8	Nivolumab
P-0016175	Adenocarcinoma	Female	76	1	1.4	1.4	Nivolumab
P-0015529	Adenocarcinoma	Female	76	1	1.9	1.8	Nivolumab
P-0045298	Adenocarcinoma	Male	74	1	-	12.7	Nivolumab
P-0024764	Adenocarcinoma	Female	74	1	-	5.1	Nivolumab
P-0027713	Squamous	Male	73	1	-	1.1	Nivolumab
P-0006516	Adenocarcinoma	Male	73	1	0.9	0.9	Nivolumab
P-0010648	Adenocarcinoma	Male	73	1	17.7	2	Nivolumab
P-0004588	Adenocarcinoma	Male	73	1	-	49.1	Nivolumab
P-0002921	Adenocarcinoma	Female	73	1	11.9	6.5	Nivolumab
P-0009068	Adenocarcinoma	Female	73	1	-	40.3	Nivolumab
P-0035638	Squamous	Male	72	1	8	3.1	Nivolumab
P-0016185	Adenocarcinoma	Male	72	1	9.1	3.5	Nivolumab
P-0012341	Adenocarcinoma	Female	72	1	2.8	0.6	Nivolumab
P-0031665	Squamous	Male	71	1	6	3	Nivolumab
P-0017722	Adenocarcinoma	Male	71	1	5.9	1.3	Nivolumab
P-0016692	Adenocarcinoma	Male	71	1	7.1	1.1	Nivolumab
P-0028173	Adenocarcinoma	Female	71	1	3.4	1.9	Nivolumab
P-0028930	Adenocarcinoma	Male	70	1	6.7	4.3	Nivolumab
P-0015987	Adenocarcinoma	Female	70	1	10.3	3.2	Nivolumab
P-0013406	Adenocarcinoma	Male	69	1	0.6	0.6	Nivolumab
P-0003275	Adenocarcinoma	Male	69	1	-	5.5	Nivolumab
P-0016224	Adenocarcinoma	Female	69	1	7.8	7.8	Nivolumab
P-0021375	Adenocarcinoma	Male	68	1	1	1	Nivolumab
P-0003735	Adenocarcinoma	Female	68	1	3.3	0.9	Nivolumab
P-0017437	Adenocarcinoma	Female	67	1	10.1	2.4	Nivolumab
P-0004476	Adenocarcinoma	Female	67	1	20.8	1.3	Nivolumab
P-0017735	Squamous	Male	66	1	23.6	3.9	Nivolumab
P-0009202	Squamous	Male	66	1	-	32.5	Nivolumab
P-0009959	Adenocarcinoma	Male	66	1	12.8	5.8	Nivolumab
P-0018197	Adenocarcinoma	Male	66	1	-	10.5	Nivolumab
P-0020192	Adenocarcinoma	Female	66	1	2.7	0.4	Nivolumab
P-0030125	Adenocarcinoma	Female	66	1	10.7	6.4	Nivolumab
P-0007068	Squamous	Male	65	1	5.9	2.1	Nivolumab
P-0014529	Squamous	Female	65	1	-	34	Nivolumab
P-0004395	Adenocarcinoma	Female	65	1	0.4	0.4	Nivolumab
P-0033892	Adenocarcinoma	Female	64	1	5.3	1.4	Nivolumab
P-0014451	Adenocarcinoma	Female	64	1	7.5	0.6	Nivolumab
P-0014736	Adenocarcinoma	Male	63	1	1.1	9.5	Nivolumab
P-0023023	Adenocarcinoma	Male	63	1	-	8.4	Nivolumab
P-0023596	Adenocarcinoma	Male	62	1	2.5	1.4	Nivolumab
P-0018820	Adenocarcinoma	Female	61	1	-	16.3	Nivolumab
P-0006046	Adenocarcinoma	Male	60	1	-	30.7	Nivolumab
P-0015075	Adenocarcinoma	Male	59	1	11.3	0.4	Nivolumab
P-0012894	Adenocarcinoma	Female	58	1	5.2	1.6	Nivolumab
P-0029465	Squamous	Female	56	1	-	15.2	Nivolumab
P-0018043	Adenocarcinoma	Female	56	1	7.8	2.8	Nivolumab
P-0010840	Adenocarcinoma	Female	55	1	2.3	0.8	Nivolumab
P-0013656	Adenocarcinoma	Female	55	1	4.7	2.7	Nivolumab
P-0021266	Adenocarcinoma	Female	54	1	18.7	9.3	Nivolumab
P-0006071	Adenocarcinoma	Female	53	1	21.8	4.7	Nivolumab
P-0023902	Adenocarcinoma	Female	52	1	7	1.8	Nivolumab
P-0017910	Adenocarcinoma	Female	52	1	-	23.5	Nivolumab
P-0003551	Adenocarcinoma	Female	50	1	-	1.3	Nivolumab
P-0008645	Squamous	Male	47	1	2.1	1.7	Nivolumab
P-0005871	Adenocarcinoma	Male	47	1	-	5.6	Nivolumab
P-0008944	Adenocarcinoma	Female	46	1	10.6	1.6	Nivolumab
P-0009473	Adenocarcinoma	Male	79	0	-	40.3	Nivolumab
P-0010063	Adenocarcinoma	Male	73	0	19.4	2.6	Nivolumab
P-0010215	Adenocarcinoma	Female	73	0	3.1	0.2	Nivolumab
P-0016174	Adenocarcinoma	Female	72	0	27.6	3.2	Nivolumab
P-0025956	Adenocarcinoma	Female	71	0	4	2.6	Nivolumab
P-0006768	Adenocarcinoma	Male	66	0	28.4	4.2	Nivolumab
P-0006603	Adenocarcinoma	Female	64	0	-	30.8	Nivolumab
P-0009952	Squamous	Male	63	0	12.9	2.1	Nivolumab
P-0009110	Adenocarcinoma	Female	54	0	-	14.7	Nivolumab
P-0005783	Adenocarcinoma	Female	53	0	-	22.8	Nivolumab
P-0003635	Adenocarcinoma	Female	58	2	2.4	1.5	Ipilimumab+Nivolumab
P-0015693	Adenocarcinoma	Male	79	1	-	1.1	Ipilimumab+Nivolumab
P-0012149	Adenocarcinoma	Male	69	1	-	5.3	Ipilimumab+Nivolumab
P-0006607	Adenocarcinoma	Male	61	1	-	9.4	Ipilimumab+Nivolumab
P-0015950	Adenocarcinoma	Male	60	1	-	1.2	Ipilimumab+Nivolumab
P-0009483	Adenocarcinoma	Female	82	0	8.9	1.4	Ipilimumab+Nivolumab
P-0013653	Adenocarcinoma	Female	69	1	-	5.4	Durvalumab+Tremelimumab
P-0011260	Adenocarcinoma	Female	47	1	1.5	0.6	Durvalumab+Tremelimumab
P-0019607	Adenocarcinoma	Male	76	1	-	24.5	Durvalumab
P-0019804	Adenocarcinoma	Female	69	1	-	12.9	Durvalumab
P-0002485	Squamous	Male	43	1	24.2	7.4	Durvalumab
P-0023464	Adenocarcinoma	Female	79	2	8.4	5.3	Atezolizumab
P-0027673	Adenocarcinoma	Female	71	2	-	13.5	Atezolizumab
P-0017048	Adenocarcinoma	Female	64	2	0.4	0.4	Atezolizumab
P-0012476	Adenocarcinoma	Female	84	1	6.7	3.1	Atezolizumab
P-0019700	Adenocarcinoma	Female	81	1	-	20.2	Atezolizumab
P-0012090	Adenocarcinoma	Male	79	1	0.8	0.8	Atezolizumab
P-0025018	Squamous	Male	78	1	1.5	1.5	Atezolizumab
P-0024467	Adenocarcinoma	Male	76	1	-	7.6	Atezolizumab
P-0010980	Adenocarcinoma	Female	75	1	12.2	1.3	Atezolizumab
P-0023779	Adenocarcinoma	Male	74	1	1.6	1.6	Atezolizumab
P-0017637	Adenocarcinoma	Male	73	1	3.8	1.7	Atezolizumab
P-0014319	Adenocarcinoma	Female	73	1	4.3	0.7	Atezolizumab
P-0019252	Adenocarcinoma	Female	73	1	8.7	2.1	Atezolizumab
P-0022304	Adenocarcinoma	Male	71	1	16.7	4	Atezolizumab
P-0022033	Squamous	Female	71	1	8	0.7	Atezolizumab
P-0033979	Adenocarcinoma	Female	71	1	-	4.6	Atezolizumab
P-0023014	Adenocarcinoma	Male	69	1	1.3	1.3	Atezolizumab
P-0021094	Adenocarcinoma	Female	69	1	1.8	1.2	Atezolizumab
P-0015749	Squamous	Male	68	1	12.6	2.9	Atezolizumab
P-0027664	Adenocarcinoma	Male	68	1	-	1.2	Atezolizumab
P-0024561	Adenocarcinoma	Female	68	1	6.8	3.3	Atezolizumab
P-0013719	Adenocarcinoma	Female	68	1	17.9	2.2	Atezolizumab
P-0019605	Squamous	Male	67	1	0.8	0.8	Atezolizumab
P-0020422	Adenocarcinoma	Female	67	1	2.9	1.4	Atezolizumab
P-0022001	Adenocarcinoma	Female	67	1	6.6	1.2	Atezolizumab
P-0028712	Adenocarcinoma	Female	67	1	14.8	5.2	Atezolizumab
P-0017106	Adenocarcinoma	Female	67	1	-	2.2	Atezolizumab
P-0017253	Adenocarcinoma	Male	66	1	-	2.1	Atezolizumab
P-0021442	Adenocarcinoma	Female	66	1	2.5	1.8	Atezolizumab
P-0021833	Adenocarcinoma	Female	65	1	-	10.1	Atezolizumab
P-0012056	Adenocarcinoma	Male	63	1	3.6	1.3	Atezolizumab
P-0022377	Adenocarcinoma	Male	63	1	5	1.9	Atezolizumab
P-0020076	Adenocarcinoma	Male	62	1	-	2.2	Atezolizumab
P-0027742	Adenocarcinoma	Female	62	1	10.1	1.5	Atezolizumab
P-0001987	Adenocarcinoma	Male	57	1	-	16.4	Atezolizumab
P-0019098	Adenocarcinoma	Female	56	1	-	12	Atezolizumab
P-0019765	Adenocarcinoma	Female	56	1	-	12.8	Atezolizumab
P-0010300	Adenocarcinoma	Male	55	1	4	1.4	Atezolizumab
P-0020347	Adenocarcinoma	Female	53	1	3.9	1.5	Atezolizumab
P-0028239	Adenocarcinoma	Male	80	0	6.5	6.5	Atezolizumab
P-0010927	Adenocarcinoma	Female	67	0	-	24	Atezolizumab
P-0004271	Adenocarcinoma	Female	38	0	-	7.1	Atezolizumab
P-0028473	Adenocarcinoma	Male	70	1	-	17.4	Ipilimumab+Nivolumab
