# Supplementary material for: The efficacy of immune checkpoint inhibitors is limited in elderly NSCLC: a retrospective efficacy study and meta-analysis
Source: publisher site journal article supplement (doi:10.18632/aging.205328), 2023-12-19
Supplement: Supplementary file [file aging-v15i24-205328-supplementary-material-SD2.pdf]

## SUPPLEMENTARY FIGURES

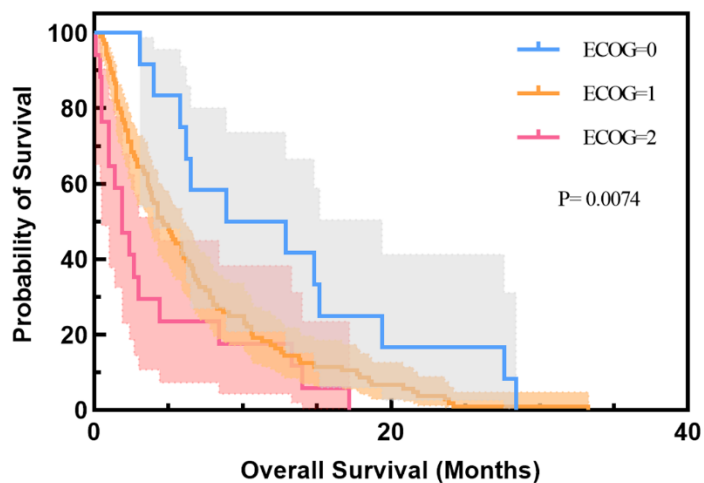

Supplementary Figure 1. Overall survival of NSCLC patients treated with ICIs based on ECOG PS in the cBio database.

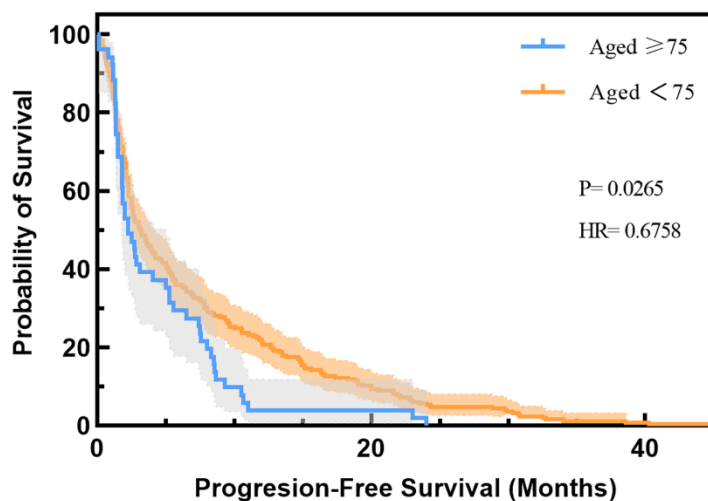

Supplementary Figure 2. Progression-free survival of NSCLC patients treated with ICIs based on age in the cBio database.

**A**

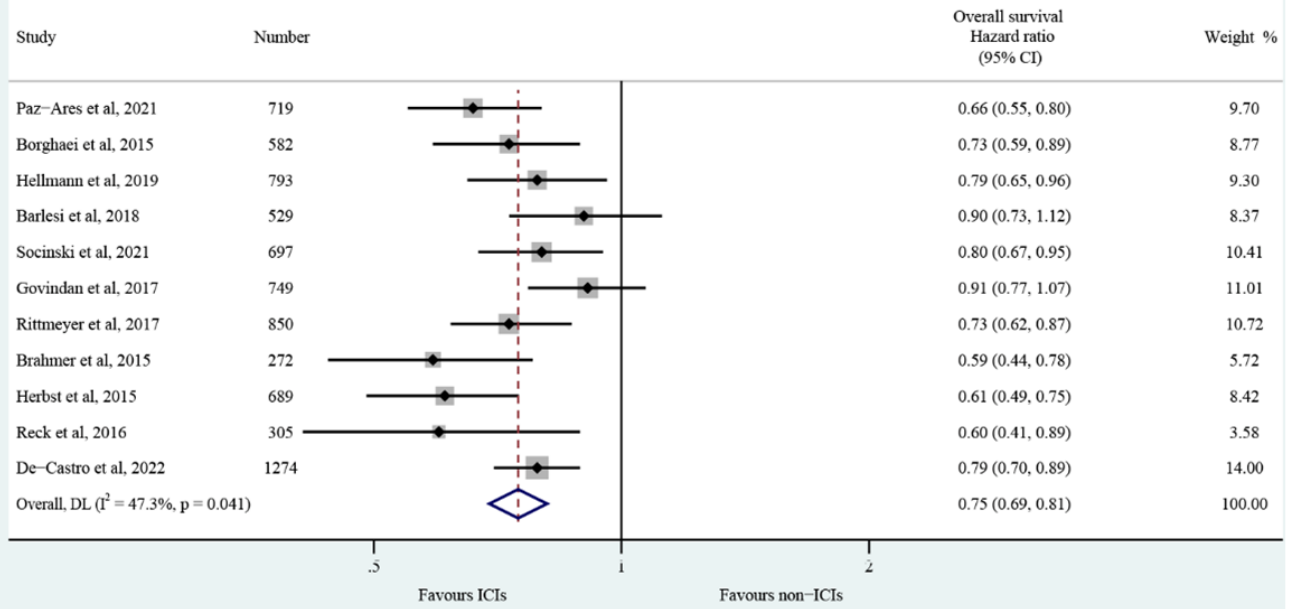

**B**

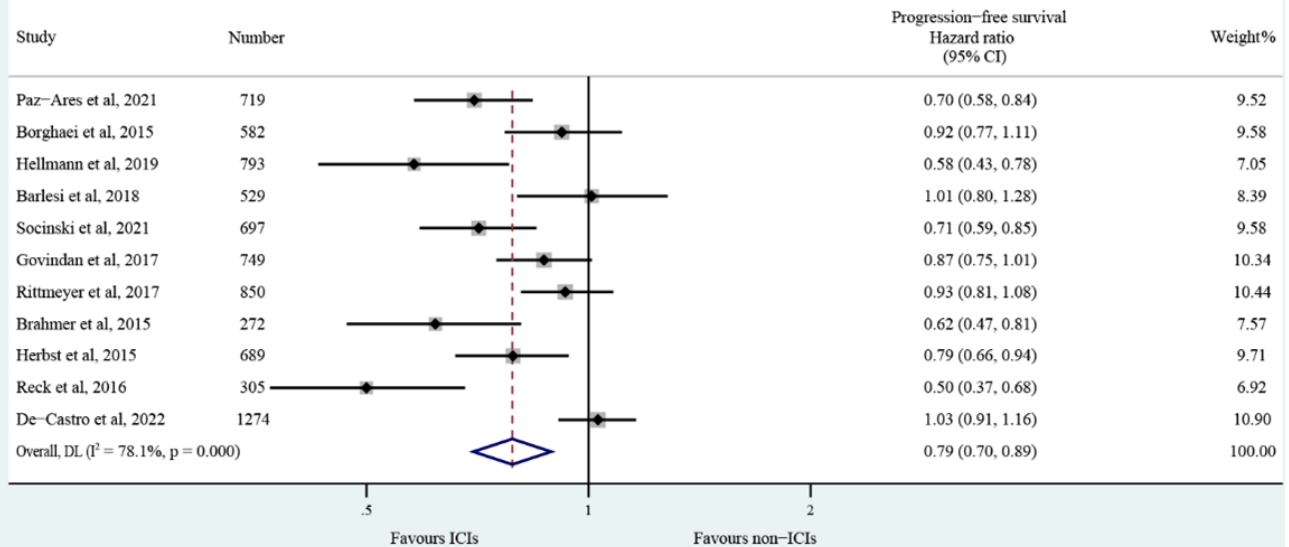

**Supplemental Figure 3.** Forest plot of the hazard ratio for overall survival (A) and progression-free survival (B). CI, confidence interval; ICIs, immune checkpoint inhibitors.

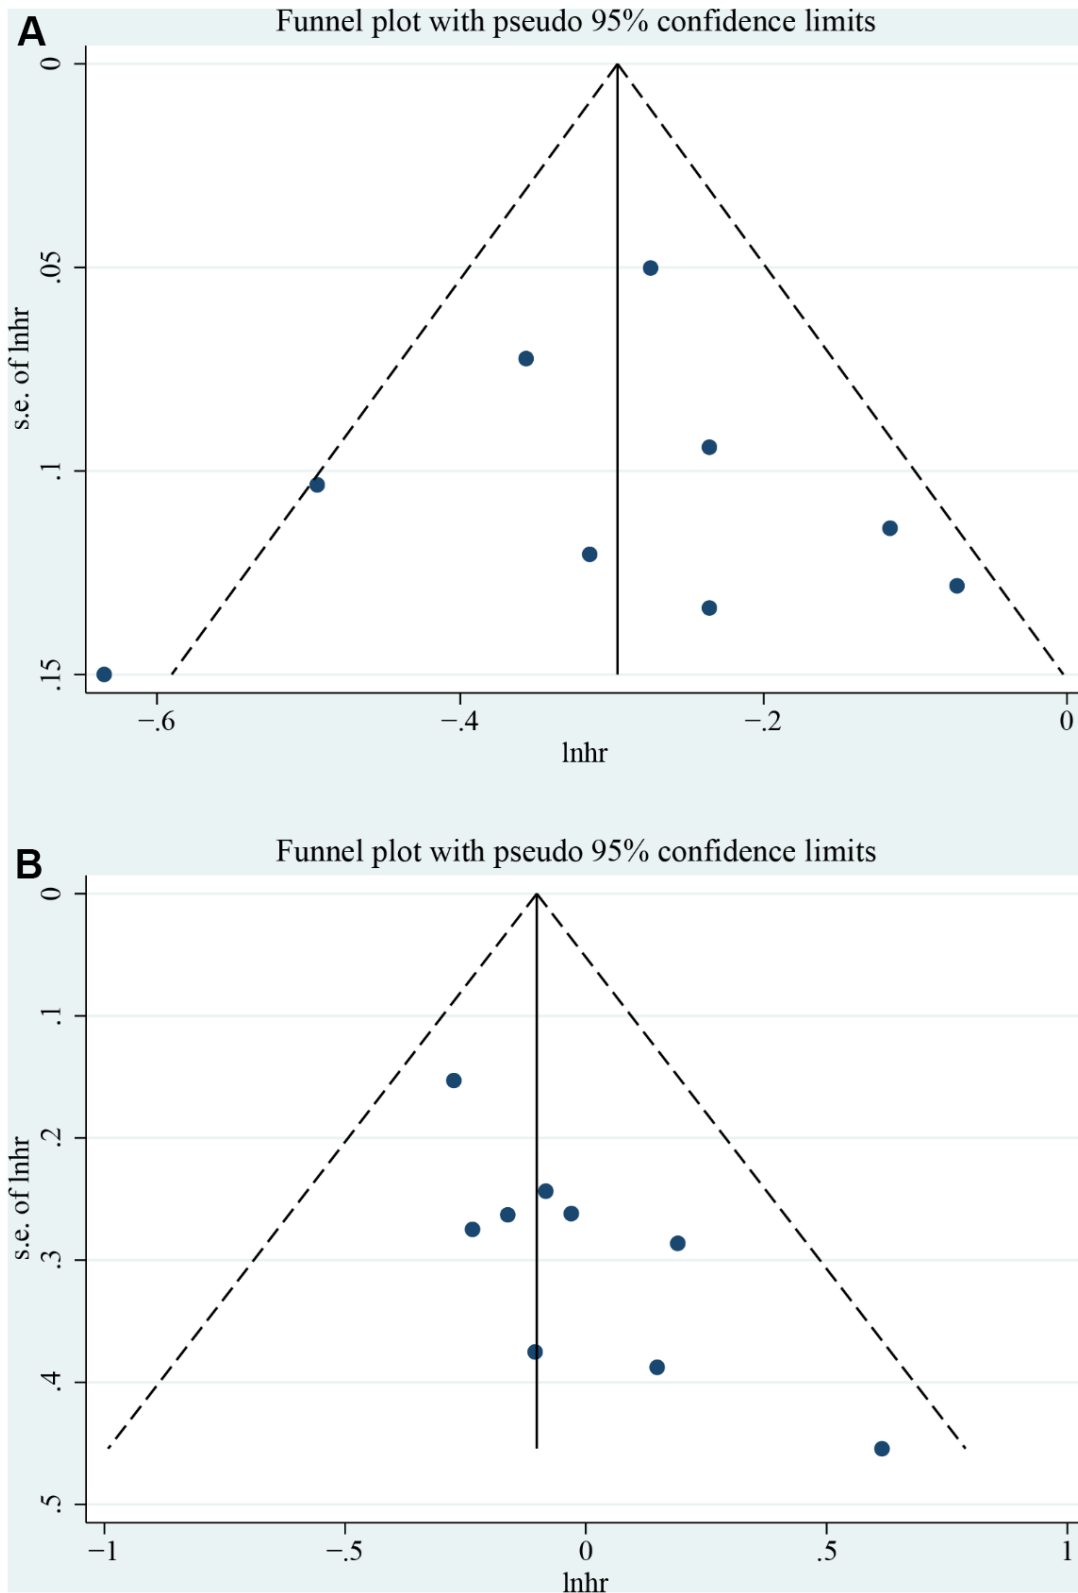

**Supplementary Figure 4.** Funnel plots of efficacy by age < 75 years (A) and ≥ 75 years (B).

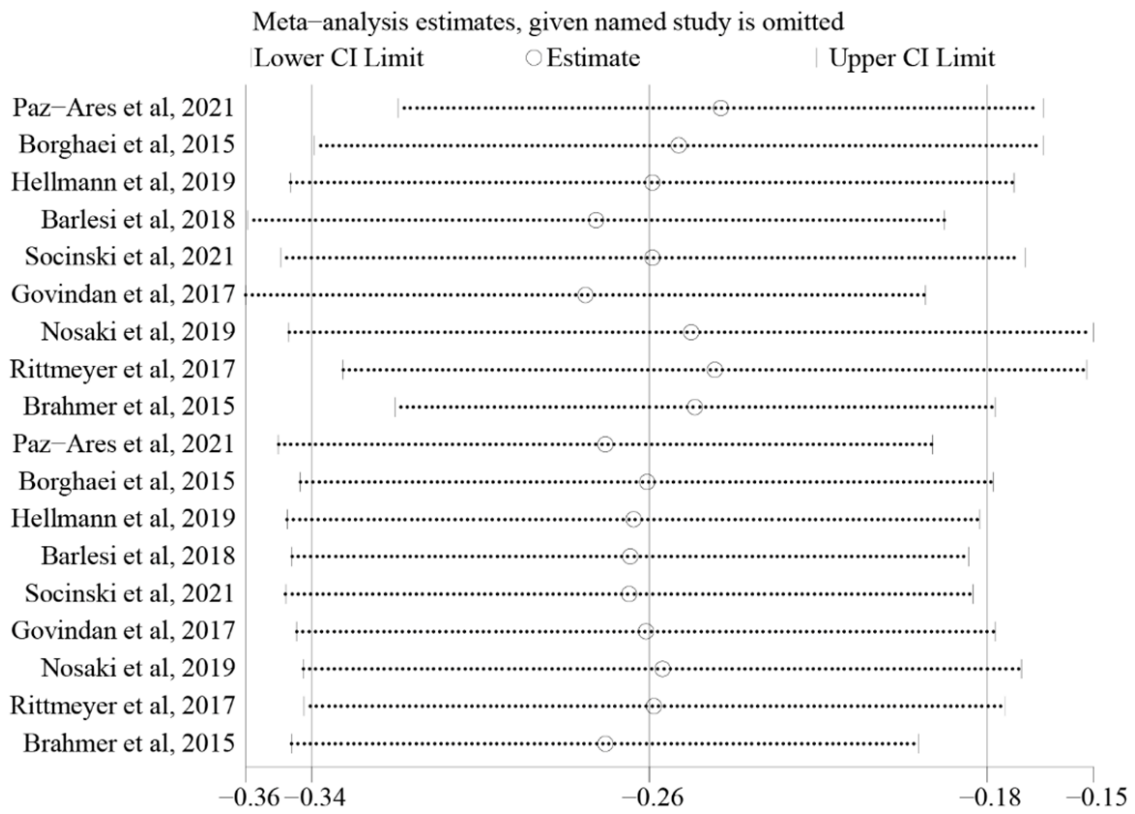

**Supplementary Figure 5. Sensitivity analysis for OS at 75 years of age threshold.** CI, confidence interval.

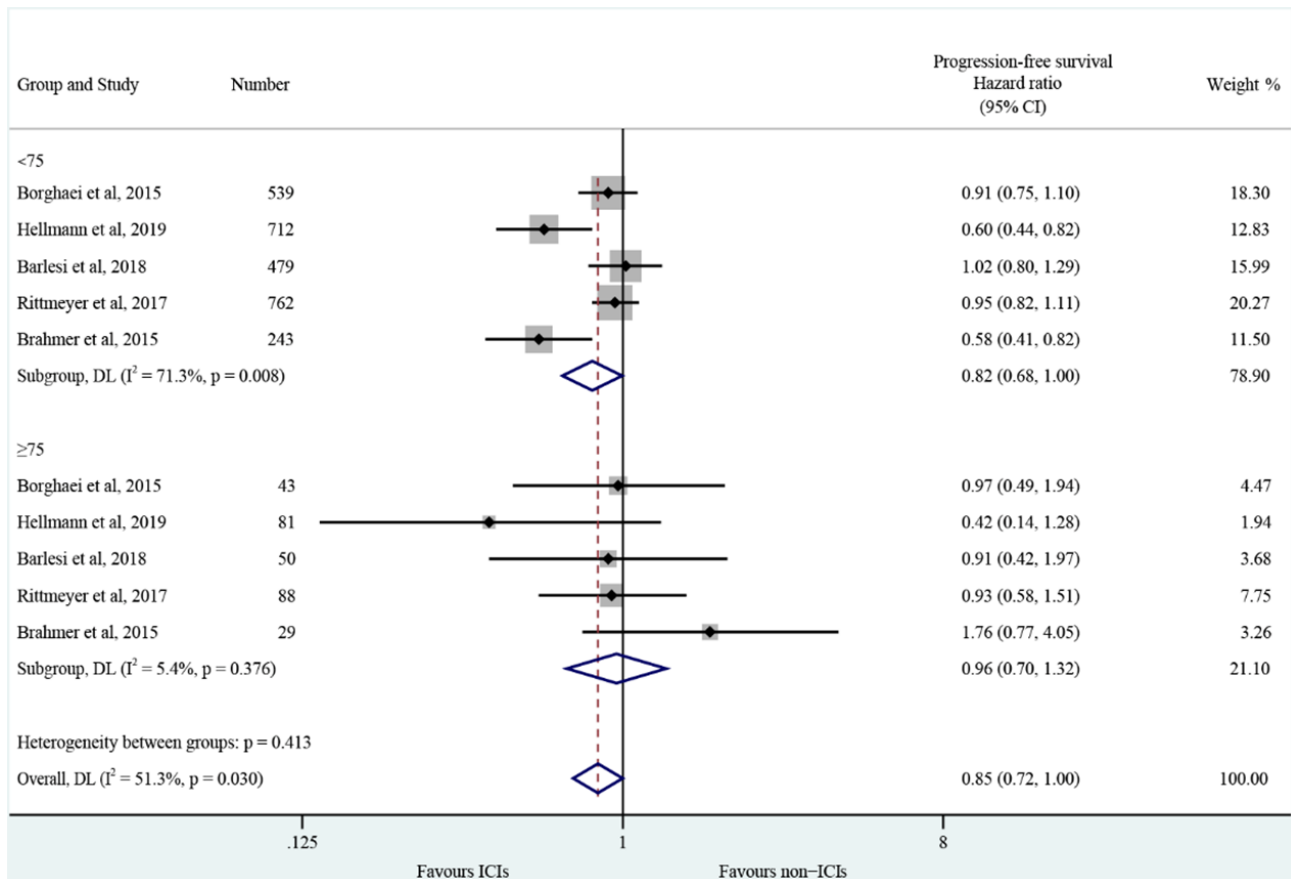

**Supplementary Figure 6. Forest plots of progression-free survival by age < 75 years and ≥ 75 years.** CI, confidence interval; ICIs, immune checkpoint inhibitors.

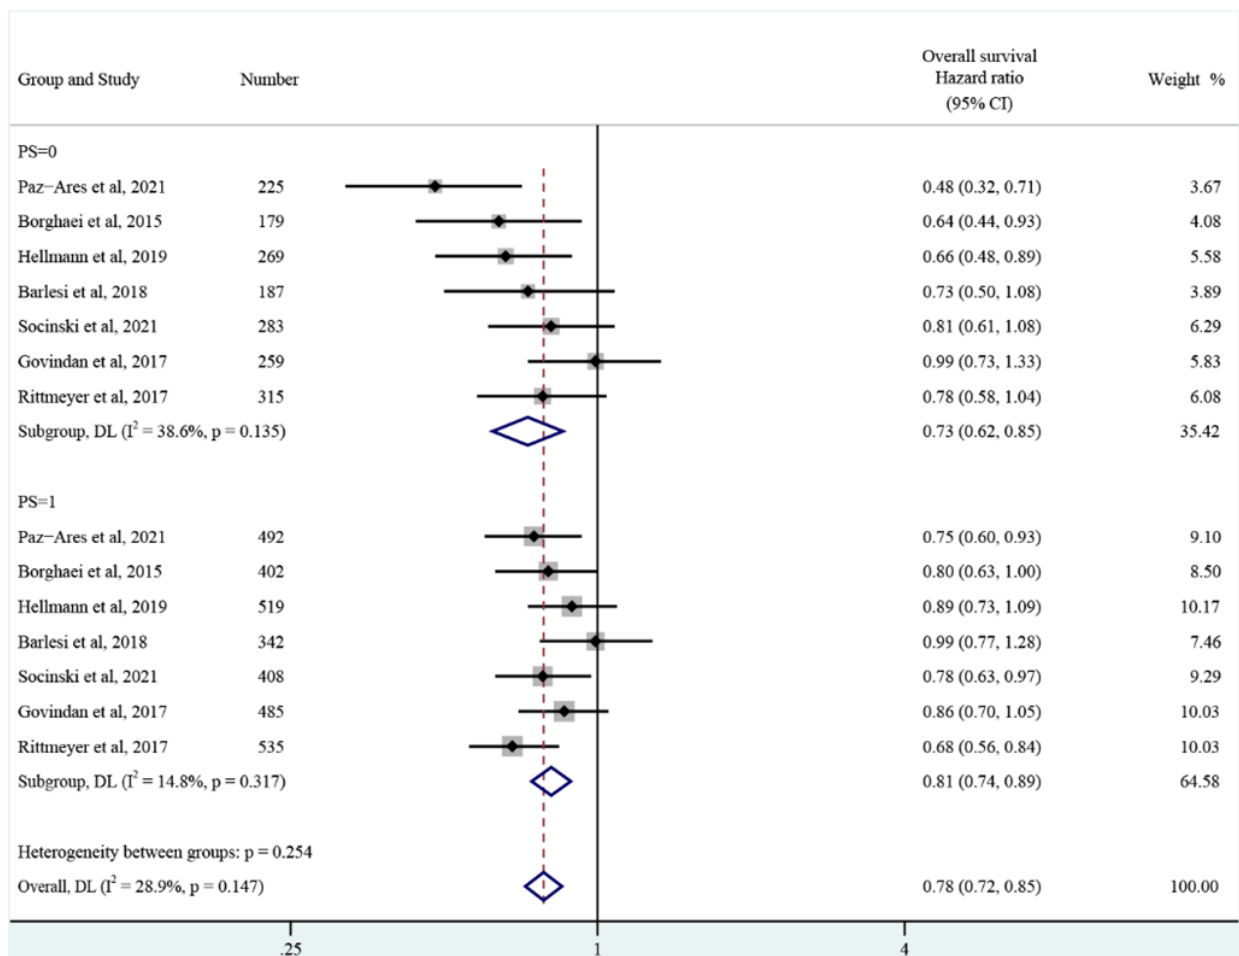

Supplementary Figure 7. Forest plots of overall survival by PS= 0 and PS= 1. CI, confidence interval; PS, performance status.

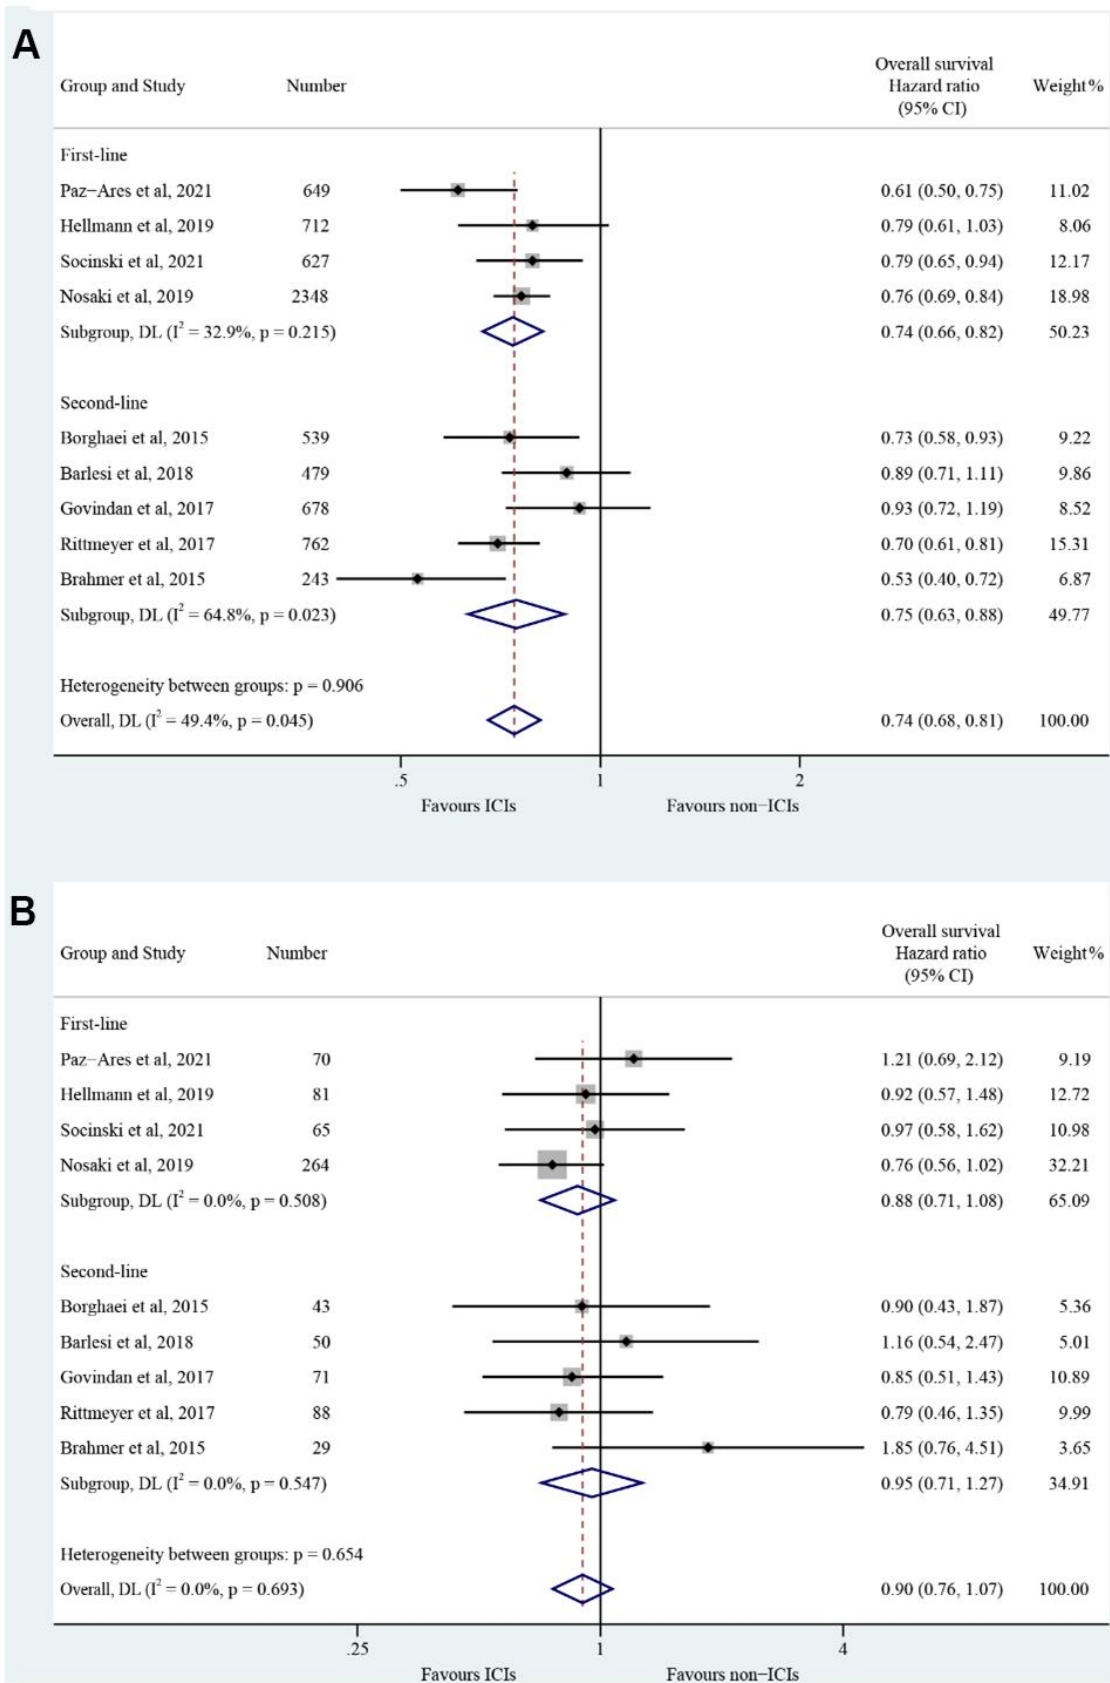

**Supplementary Figure 8.** Forest plots of aged <75 years old (A) and ≥75 years old (B) of overall survival in subgroups by treatment lines. CI, confidence interval; ICIs, immune checkpoint inhibitors.

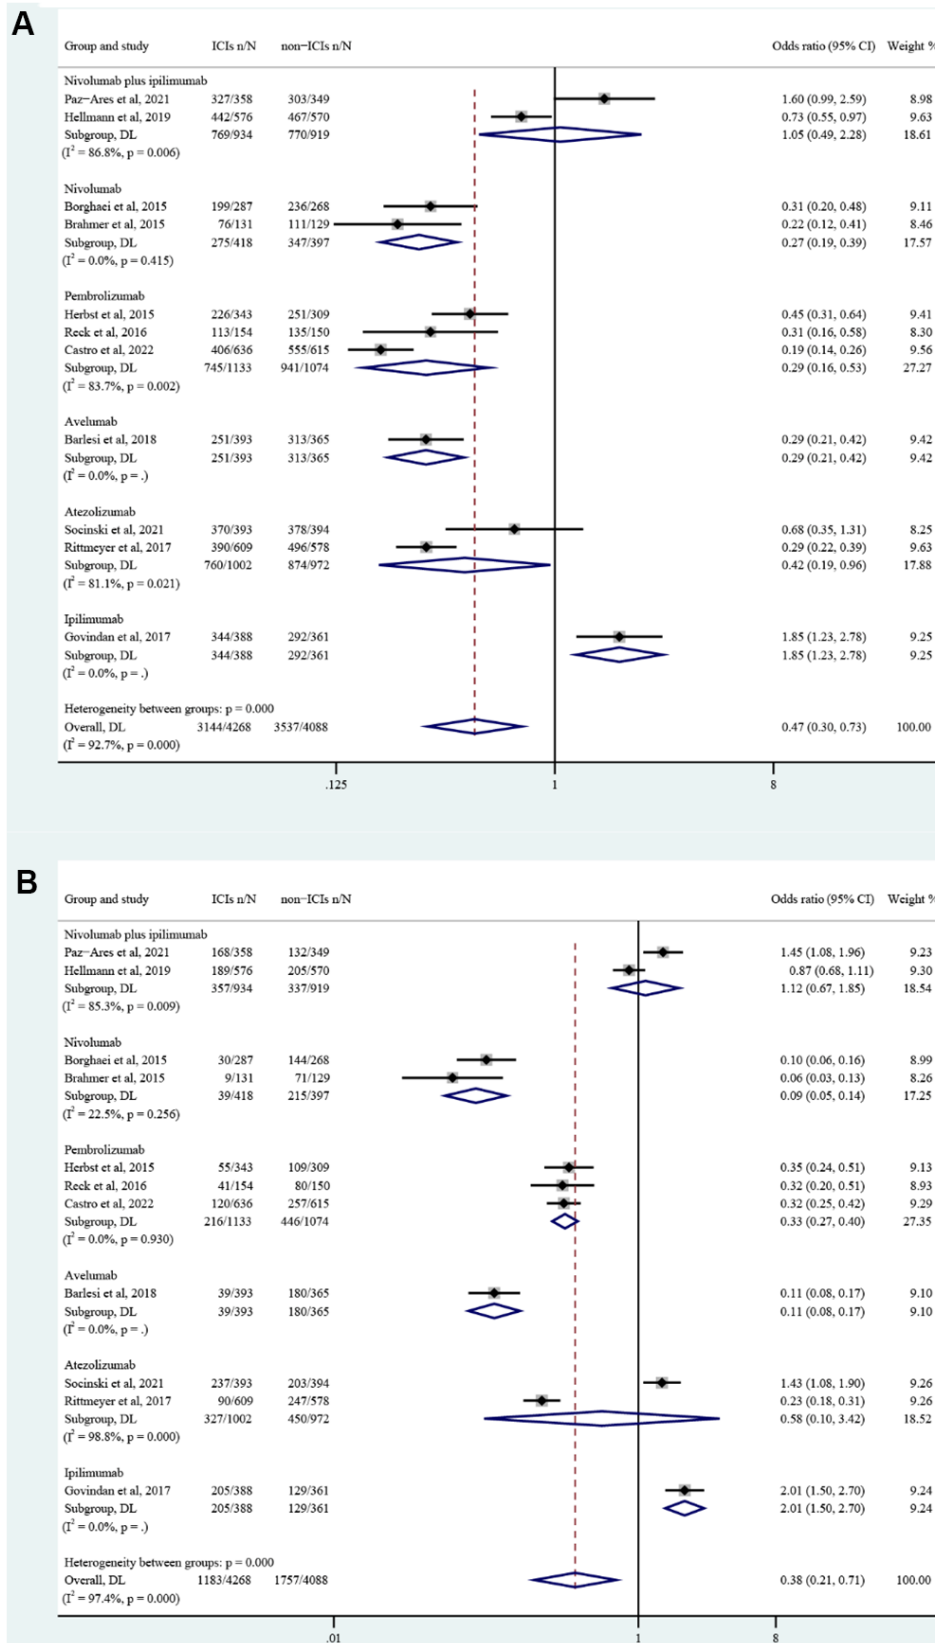

**Supplementary Figure 9.** Forest plots of all-grade (A) and high-grade (B) TRAEs in subgroups by type of ICIs. CI, confidence interval; ICIs, immune checkpoint inhibitors.
